# Supplementary material for: A silver-catalyzed radical ring-opening reaction of cyclopropanols with sulfonyl oxime ethers
Source: Royal Society of Chemistry journal article supplement (doi:10.1039/d0ob00055h), 2020-01-01

Supplementary Information for  
**Silver-Catalyzed Radical Ring-Opening Reaction of  
Cyclopropanols with Sulfonyl Oxime Ethers**

Xiaobao Zeng\*, Xin Wang, Yanan Zhang, Li Zhu, Yu Zhao\*

School of Pharmacy, Nantong University, 19 Qixiu Road, Nantong,

Jiangsu Province 226001, People's Republic of China

Email: zengxb@ntu.edu.cn; zhaoyu@ntu.edu.cn

**List**

- 1. Structures of Starting Materials 1a-e, 2a-o.....S2.**
- 2. General information.....S3**
- 3. Characterizations of compounds 3aa-w, 7-10.....S3-18**
- 4. References.....S19**
- 5. NMR spectra of compounds 3aa-i, 3am-w, 7-11...S19-S48**

## Structures of Starting Materials 1a-e

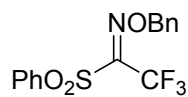

**1a**

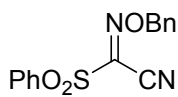

**1b**

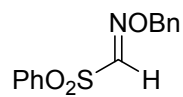

**1c**

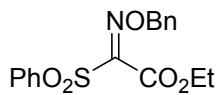

**1d**

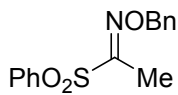

**1e**

## Structures of Starting Materials 2a-o

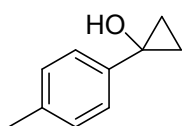

**2a**

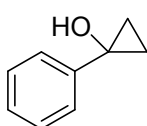

**2b**

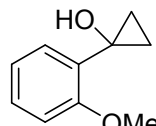

**2c**

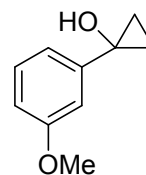

**2d**

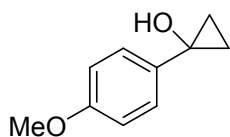

**2e**

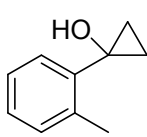

**2f**

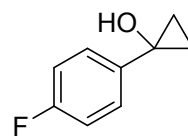

**2g**

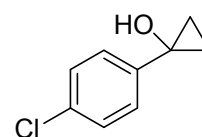

**2h**

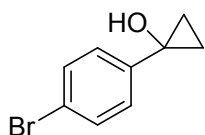

**2i**

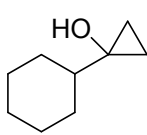

**2j**

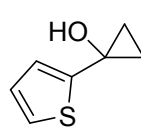

**2k**

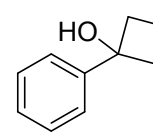

**2l**

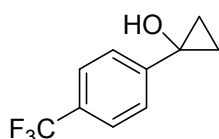

**2m**

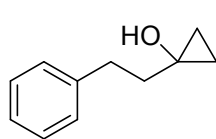

**2n**

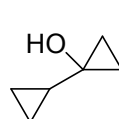

**2o**

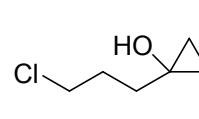

**2p**

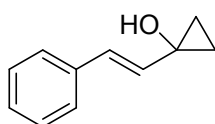

**2q**

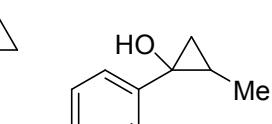

**2r**

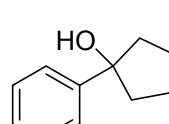

**2s**

## 2. General Information

All  $^1\text{H}$  NMR (400 MHz) and  $^{13}\text{C}$  NMR (100 MHz) spectra were recorded in  $\text{CDCl}_3$ . TMS was used as an internal reference and  $J$  values are given in Hz. HR-MS were obtained on a Bruker micrOTOF-Q II spectrometer. PE is petroleum ether (60–90 °C). All sulfonyl oxime ethers (**1a-e**)<sup>1</sup> and cyclopropanols (**2a-o**)<sup>2</sup> are known compounds. They were purchased directly or were prepared according to the reported procedures. Unless otherwise noted, materials obtained from commercial suppliers were used without further purification.

## 3. Preparation and characterizations of compounds 3aa-i, 3aj-w

### 3.1 Preparation and characterizations of compounds 3aa-i

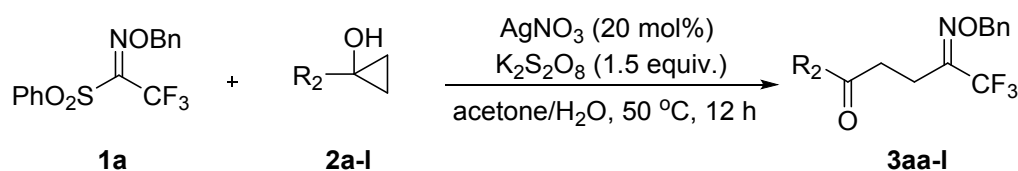

A mixture of  $\text{CF}_3$ -containing sulfonyl oxime ethers (**1a**) (0.3 mmol, 103 mg), cyclopropanols (**2a-l**) (0.45 mmol),  $\text{AgNO}_3$  (0.06 mmol, 10.2 mg) and  $\text{K}_2\text{S}_2\text{O}_8$  (0.45 mmol, 122 mg) in acetone: $\text{H}_2\text{O}$  (1:1, 2 mL) was stirred at 50 °C for 12 h (monitored by TLC). After it was cooled down to room temperature, the mixture was poured into water (15 mL) and was extracted with EtOAc (3 x 15 mL). The combined organic layers were washed with brine (2 x 15 mL) and dried over  $\text{MgSO}_4$ . The solvent was removed by vacuum and the residue was purified by preparative thin layer

chromatography (PTLC) (5% acetone in PE) to give the corresponding products.

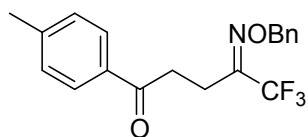

**3aa**, 65%

***E*-4-((benzyloxy)imino)-5,5,5-trifluoro-1-(*p*-tolyl)pentan-1-one (3aa).**

68 mg (65%); yellow oil;  $^1\text{H NMR}$  (400MHz,  $\text{CDCl}_3$ )  $\delta$  7.79 (d,  $J = 8.1$  Hz, 2H), 7.34 (s, 5H), 7.22 (d,  $J = 8.0$  Hz, 2H), 5.22 (s, 2H), 3.22-3.13 (m, 2H), 2.89 -2.80 (m, 2H), 2.40 (s, 3H).  $^{13}\text{C NMR}$  (100 MHz,  $\text{CDCl}_3$ )  $\delta$  197.1, 148.9 (q,  $J_{\text{C-F}} = 32$  Hz), 144.2, 136.1, 133.7, 129.3, 128.6, 128.5, 128.4, 128.1, 120.8 (q,  $J_{\text{C-F}} = 272$  Hz), 77.8, 33.8, 21.6, 19.7.  $^{19}\text{F NMR}$ : (376 MHz,  $\text{CDCl}_3$ )  $\delta$  -69.3 (s, 3F); HRMS  $m/z$  (ESI) calcd. for  $\text{C}_{19}\text{H}_{19}\text{F}_3\text{NO}_2$  ( $\text{M} + \text{H}$ ) $^+$  350.1362, found 350.1365.

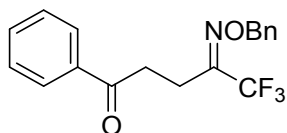

**3ab**, 63%

***E*-4-((benzyloxy)imino)-5,5,5-trifluoro-1-phenylpentan-1-one (3ab).**

64 mg (63%); yellow oil;  $^1\text{H NMR}$  (400MHz,  $\text{CDCl}_3$ )  $\delta$  7.88 (d,  $J = 7.6$  Hz, 2H), 7.57-7.53 (m, 1H), 7.44-7.40 (m, 2H), 7.37-7.32 (m, 5H), 5.22 (s, 2H), 3.23-3.17 (m, 2H), 2.89-2.81 (m, 2H).  $^{13}\text{C NMR}$  (100 MHz,  $\text{CDCl}_3$ )  $\delta$  197.4, 148.8 (q,  $J_{\text{C-F}} = 32$  Hz), 136.1 (2C), 133.3, 128.6, 128.5, 128.4, 128.3, 127.9, 120.8 (q,  $J_{\text{C-F}} = 272$  Hz), 77.8, 33.9, 19.6.  $^{19}\text{F NMR}$ : (376 MHz,  $\text{CDCl}_3$ )  $\delta$  -69.3 (s, 3F); HRMS  $m/z$  (ESI) calcd. for  $\text{C}_{18}\text{H}_{17}\text{F}_3\text{NO}_2$  ( $\text{M}$

+ H)<sup>+</sup> 336.1206, found 336.1203.

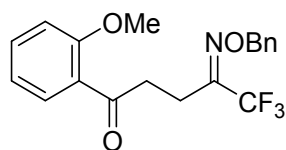

**3ac**, 46%

***E*-4-((benzyloxy)imino)-5,5,5-trifluoro-1-(2-methoxyphenyl)pentan-1-one (3ac)**. 51 mg (46%); yellow oil; <sup>1</sup>H NMR (400MHz, CDCl<sub>3</sub>) δ 7.72 (dd, *J* = 7.8, 1.8 Hz, 1H), 7.52-7.43 (m, 1H), 7.35-7.30 (m, 5H), 7.03-6.91 (m, 2H), 5.22 (s, 2H), 3.82 (s, 3H), 3.28-3.17 (m, 2H), 2.90-2.78 (m, 2H). <sup>13</sup>C NMR (100 MHz, CDCl<sub>3</sub>) δ 199.4, 158.8, 149.1 (q, *J*<sub>C-F</sub> = 31 Hz), 136.4, 133.9, 130.5, 128.5, 128.3, 128.2, 127.2, 120.9 (q, *J*<sub>C-F</sub> = 273 Hz), 120.7, 111.5, 77.6, 55.4, 39.0, 19.8. <sup>19</sup>F NMR: (376 MHz, CDCl<sub>3</sub>) δ -69.2 (s, 3F); HRMS *m/z* (ESI) calcd. for C<sub>19</sub>H<sub>19</sub>F<sub>3</sub>NO<sub>3</sub> (M + H)<sup>+</sup> 366.1312, found 366.1315.

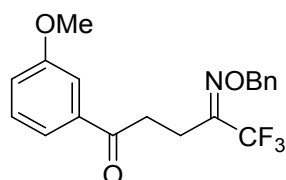

**3ad**, 53%

***E*-4-((benzyloxy)imino)-5,5,5-trifluoro-1-(3-methoxyphenyl)pentan-1-one (3ad)**. 58 mg (53%); yellow oil; <sup>1</sup>H NMR (400MHz, CDCl<sub>3</sub>) δ 7.48-7.40 (m, 2H), 7.36-7.30 (m, 6H), 7.12-7.09 (m, 2.7 Hz, 1H), 5.22 (s, 2H), 3.84 (s, 3H), 3.23-3.15 (m, 2H), 2.89-2.80 (m, 2H). <sup>13</sup>C NMR (100 MHz, CDCl<sub>3</sub>) δ 197.3, 159.8, 148.8 (q, *J*<sub>C-F</sub> = 32 Hz), 137.5, 136.1, 129.6, 128.6, 128.5, 128.4, 120.8 (q, *J*<sub>C-F</sub> = 272 Hz), 120.6, 119.8, 112.2, 77.9, 55.4, 34.1,

19.6.  $^{19}\text{F}$  NMR: (376 MHz,  $\text{CDCl}_3$ )  $\delta$  -69.3 (s, 3F); HRMS  $m/z$  (ESI)

calcd. for  $\text{C}_{19}\text{H}_{19}\text{F}_3\text{NO}_3$  ( $\text{M} + \text{H}$ ) $^+$  366.1312, found 366.1310.

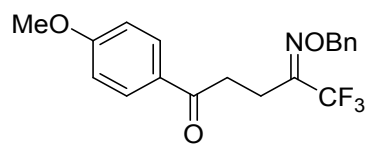

**3ae**, 61%

***E*-4-((benzyloxy)imino)-5,5,5-trifluoro-1-(4-methoxyphenyl)pentan-1-**

**one (3ae)**. 67 mg (61%); yellow oil;  $^1\text{H}$  NMR (400MHz,  $\text{CDCl}_3$ )  $\delta$  7.90-

7.84 (m, 2H), 7.37-7.33 (m, 5H), 6.91-6.85 (m, 2H), 5.22 (s, 2H), 3.86 (s,

3H), 3.18-3.11 (m, 2H), 2.87-2.80 (m, 2H).  $^{13}\text{C}$  NMR (100 MHz,  $\text{CDCl}_3$ )

$\delta$  196.0, 163.6, 149.0 (q,  $J_{\text{C-F}} = 32$  Hz), 136.1, 130.3, 129.2, 128.5 (2C),

128.4, 120.8 (q,  $J_{\text{C-F}} = 273$  Hz), 113.8, 77.9, 55.5, 33.6, 19.8.  $^{19}\text{F}$  NMR:

(376 MHz,  $\text{CDCl}_3$ )  $\delta$  -69.3 (s, 3F); HRMS  $m/z$  (ESI) calcd. for

$\text{C}_{19}\text{H}_{19}\text{F}_3\text{NO}_3$  ( $\text{M} + \text{H}$ ) $^+$  366.1312, found 366.1313.

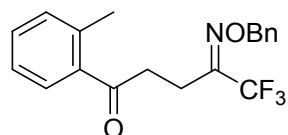

**3af**, 45%

***E*-4-((benzyloxy)imino)-5,5,5-trifluoro-1-(*o*-tolyl)pentan-1-one (3af)**.

47 mg (45%); yellow oil;  $^1\text{H}$  NMR (400MHz,  $\text{CDCl}_3$ )  $\delta$  7.55 (d,  $J = 7.7$

Hz, 1H), 7.35 (s, 6H), 7.26-7.17 (m, 2H), 5.23 (s, 2H), 3.23-3.09 (m, 2H),

2.90 -2.77 (m, 2H), 2.48 (s, 3H).  $^{13}\text{C}$  NMR (100 MHz,  $\text{CDCl}_3$ )  $\delta$  200.9,

148.7 (q,  $J_{\text{C-F}} = 32$  Hz), 138.6, 136.7, 136.2, 132.1, 131.7, 128.6, 128.5

(2C), 128.4, 125.7, 120.8 (q,  $J_{\text{C-F}} = 273$  Hz), 77.9, 36.4, 21.5, 19.7.  $^{19}\text{F}$

NMR: (376 MHz,  $\text{CDCl}_3$ )  $\delta$  -69.3 (s, 3F); HRMS  $m/z$  (ESI) calcd. for

C<sub>19</sub>H<sub>19</sub>F<sub>3</sub>NO<sub>2</sub> (M + H)<sup>+</sup> 350.1362, found 350.1364.

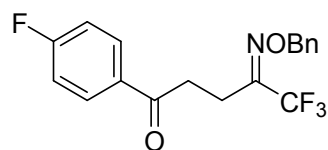

**3ag**, 51%

***E*-4-((benzyloxy)imino)-5,5,5-trifluoro-1-(4-fluorophenyl)pentan-1-one (3ag)**. 54 mg (51%); yellow oil; <sup>1</sup>H NMR (400MHz, CDCl<sub>3</sub>) δ 7.91 (dd, *J* = 8.7, 5.4 Hz, 2H), 7.36-73.4 (m, 5H), 7.10-7.06 (m, 2H), 5.23 (s, 2H), 3.20-3.13 (m, 2H), 2.89-2.80 (m, 2H). <sup>13</sup>C NMR (100 MHz, CDCl<sub>3</sub>) δ 195.9, 165.8 (d, *J*<sub>C-F</sub> = 254 Hz), 148.7 (q, *J*<sub>C-F</sub> = 32 Hz), 136.1, 132.6 (d, *J*<sub>C-F</sub> = 3 Hz), 130.7, 130.6, 128.6, 128.5, 120.8 (q, *J*<sub>C-F</sub> = 273 Hz), 115.8 (d, *J*<sub>C-F</sub> = 21 Hz), 78.0, 33.9, 19.6. <sup>19</sup>F NMR: (376 MHz, CDCl<sub>3</sub>) δ -69.4 (s, 3F), -104.7(tt, *J* = 8.4, 5.5 Hz, 1F); HRMS *m/z* (ESI) calcd. for C<sub>18</sub>H<sub>16</sub>F<sub>4</sub>NO<sub>2</sub> (M + H)<sup>+</sup> 354.1112, found 354.1115.

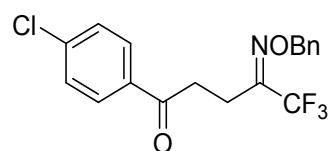

**3ah**, 54%

***E*-4-((benzyloxy)imino)-1-(4-chlorophenyl)-5,5,5-trifluoropentan-1-one (3ah)**. 60 mg (54%); yellow oil; <sup>1</sup>H NMR (400MHz, CDCl<sub>3</sub>) δ 7.81 (d, *J* = 8.5 Hz, 2H), 7.41-7.31 (m, 7H), 5.22 (s, 2H), 3.20-3.12 (m, 2H), 2.87-2.80 (m, 2H). <sup>13</sup>C NMR (100 MHz, CDCl<sub>3</sub>) δ 196.2, 148.6 (q, *J*<sub>C-F</sub> = 32 Hz), 139.8, 136.0, 134.4, 129.4, 129.0, 128.6 (2C), 128.5, 120.8 (q, *J*<sub>C-F</sub> = 273 Hz), 78.0, 34.0, 19.6. <sup>19</sup>F NMR: (376 MHz, CDCl<sub>3</sub>) δ -69.3 (s,

3F); HRMS  $m/z$  (ESI) calcd. for  $C_{18}H_{16}ClF_3NO_2$  ( $M + H$ )<sup>+</sup> 370.0816, found 370.0815.

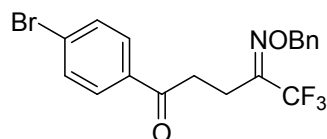

**3ai**, 53%

### ***E*-4-((benzyloxy)imino)-1-(4-bromophenyl)-5,5,5-trifluoropentan-1-**

**one (3ai)**. 66 mg (53%); yellow oil; <sup>1</sup>H NMR (400MHz, CDCl<sub>3</sub>) δ 7.73 (d,  $J = 8.5$  Hz, 2H), 7.55 (d,  $J = 8.5$  Hz, 2H), 7.37-7.32 (m, 5H), 5.22 (s, 2H), 3.19-3.12 (m, 2H), 2.87-2.80 (m, 2H). <sup>13</sup>C NMR (100 MHz, CDCl<sub>3</sub>) δ 196.4, 148.6 (q,  $J_{C-F} = 32$  Hz), 136.0, 134.8, 131.9, 129.5, 128.6 (2C), 128.5, 128.4, 120.8 (q,  $J_{C-F} = 273$  Hz), 78.0, 33.9, 19.5. <sup>19</sup>F NMR: (376 MHz, CDCl<sub>3</sub>) δ -69.3 (s, 3F); HRMS  $m/z$  (ESI) calcd. for  $C_{18}H_{16}BrF_3NO_2$  ( $M + H$ )<sup>+</sup> 414.0311, found 414.0313.

### **3.2 Preparation and characterizations of compounds 3aj-w**

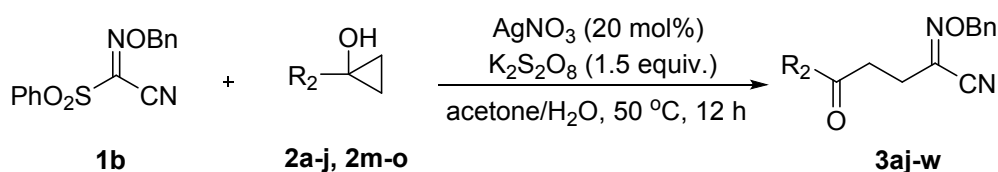

A mixture of CN-containing sulfonyl oxime ethers (**1b**) (0.3 mmol, 90 mg), cyclopropanols (**2a-j**, **2m-o**) (0.45 mmol), AgNO<sub>3</sub> (0.06 mmol, 10.2 mg) and K<sub>2</sub>S<sub>2</sub>O<sub>8</sub> (0.45 mmol, 122 mg) in acetone:H<sub>2</sub>O (1:1, 2 mL) was stirred at 50 °C for 12 h (monitored by TLC). After it was cooled down to room temperature, the mixture was poured into water (15 mL) and was extracted



with EtOAc (3 x 15 mL). The combined organic layers were washed with brine (2 x 15 mL) and dried over MgSO<sub>4</sub>. The solvent was removed by vacuum and the residue was purified by preparative thin layer chromatography (PTLC) (5% EA in PE) to give the corresponding products.

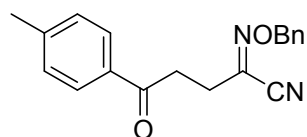

**3aj**, 71%

***N*-(benzyloxy)-4-oxo-4-(*p*-tolyl)butanimidoyl cyanide (3aj).** 65 mg (71%). 1.9:1 of two isomers, colorless oil; **<sup>1</sup>H NMR: (400 MHz, CDCl<sub>3</sub>)** δ 7.85-7.82 (m, 2H), 7.40-7.21 (m, 7H), 5.26 (s, 2H<sub>minor</sub>), 5.19 (s, 2H<sub>major</sub>), 3.28-3.24 (m, 2H), 2.89-2.86 (m, 2H), 2.41 (s, 3H<sub>major</sub>), 2.40 (s, 3H<sub>minor</sub>). **Detectable signals of <sup>13</sup>C NMR (100 MHz, CDCl<sub>3</sub>)** δ 196.5, 196.4, 144.4, 144.3, 138.3, 135.8, 135.6, 133.7, 133.5, 131.2, 129.3, 129.2, 128.6, 128.5 (2C), 128.4 (2C), 128.3, 128.1, 114.3, 110.3, 78.5, 77.8, 34.0, 33.7, 26.5, 22.7, 21.6. HRMS *m/z* (ESI) calcd. For C<sub>19</sub>H<sub>19</sub>N<sub>2</sub>O<sub>2</sub> (M + H)<sup>+</sup> 307.1441, found 307.1443.

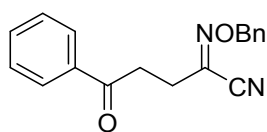

**3ak**, 68%

***N*-(benzyloxy)-4-oxo-4-phenylbutanimidoyl cyanide (3ak).** 60 mg (68%). 1.8:1 of two isomers, colorless oil; **<sup>1</sup>H NMR: (400 MHz, CDCl<sub>3</sub>)** δ 7.93-7.91 (m, 2H), 7.59-7.55 (m, 1H), 7.47-7.42 (m, 2H), 7.34-7.29 (m, 5H), 5.25 (s, 2H<sub>minor</sub>), 5.17 (s, 2H<sub>major</sub>), 3.29-3.25 (m, 2H), 2.88-2.85 (m,

2H). Detectable signals of  $^{13}\text{C}$  NMR (100 MHz,  $\text{CDCl}_3$ )  $\delta$  196.9, 196.7, 138.2, 136.1, 135.9, 135.8, 135.6, 133.5, 133.4, 131.1, 128.6, 128.5(3C), 128.4, 128.3 (2C), 127.9, 114.3, 110.2, 78.5, 77.8, 34.1, 33.9, 26.4, 22.6. HRMS  $m/z$  (ESI) calcd. For  $\text{C}_{18}\text{H}_{17}\text{N}_2\text{O}_2$  ( $\text{M} + \text{H}$ ) $^+$  293.1285, found 293.1283.

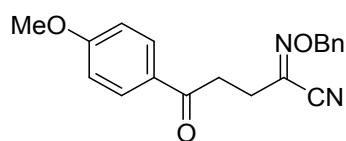

**3al**, 65%

***N*-(benzyloxy)-4-(4-methoxyphenyl)-4-oxobutanimidoyl cyanide (3al).**

63 mg (65%). 1.9:1 of two isomers, colorless oil;  $^1\text{H}$  NMR: (400 MHz,  $\text{CDCl}_3$ )  $\delta$  7.96-7.89 (m, 2H), 7.41-7.27 (m, 5H), 6.96-6.90 (m, 2H), 5.27 (s, 2H<sub>E</sub>), 5.20 (s, 2H<sub>Z</sub>), 3.87 (s, 3H<sub>minor</sub>), 3.86 (s, 3H<sub>major</sub>) 3.27-3.23 (m, 2H), 2.90-2.86 (m, 2H). Detectable signals of  $^{13}\text{C}$  NMR (100 MHz,  $\text{CDCl}_3$ )  $\delta$  195.4, 195.3, 163.7, 163.6, 138.4, 135.9, 135.7, 131.4, 130.3, 129.3, 129.1, 128.6 (3C), 128.5, 128.4, 128.3, 113.8, 113.7, 110.3, 78.5, 77.8, 55.5, 33.9, 33.5, 26.6, 22.8. HRMS  $m/z$  (ESI) calcd. For  $\text{C}_{19}\text{H}_{19}\text{N}_2\text{O}_3$  ( $\text{M} + \text{H}$ ) $^+$  323.1390, found 323.1393.

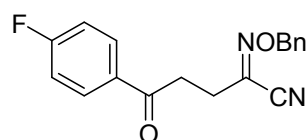

**3am**, 55%

***N*-(benzyloxy)-4-(4-fluorophenyl)-4-oxobutanimidoyl cyanide (3am).**

51 mg (55%). 1.5:1 of two isomers, colorless oil;  $^1\text{H}$  NMR: (400 MHz,  $\text{CDCl}_3$ )  $\delta$  7.98-7.95 (m, 2H), 7.43-7.26 (m, 5H), 7.17-7.11 (m, 2H), 5.28

(s, 2H<sub>minor</sub>), 5.20 (s, 2H<sub>major</sub>), 3.29-3.25 (m, 2H), 2.92-2.87 (m, 2H).

**Detectable signals of <sup>13</sup>C NMR (100 MHz, CDCl<sub>3</sub>)** δ 195.3, 195.2, 167.2 (2C), 164.7, 164.6, 138.0, 135.9, 135.6, 132.7, 132.6, 132.5, 132.4, 131.1, 130.7 (2C), 130.6 (2C), 128.7, 128.6, 128.5, 128.4, 116.0, 115.9, 115.8, 115.7, 114.3, 110.3, 78.6, 77.9, 34.1, 33.9, 26.5, 22.6. HRMS *m/z* (ESI) calcd. For C<sub>18</sub>H<sub>16</sub>FN<sub>2</sub>O<sub>2</sub> (M + H)<sup>+</sup> 311.1190, found 311.1193.

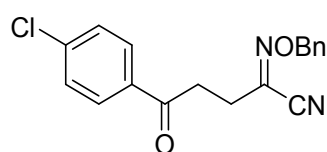

**3an**, 57%

***N*-(benzyloxy)-4-(4-chlorophenyl)-4-oxobutanimidoyl cyanide (3an).**

56 mg (57%). 2.3:1 of two isomers, colorless oil; <sup>1</sup>H NMR: (400 MHz, CDCl<sub>3</sub>) δ 7.88-7.86 (m, 2H), 7.45-7.40 (m, 2H), 7.39-7.27 (m, 5H), 5.27 (s, 2H<sub>minor</sub>), 5.19 (s, 2H<sub>major</sub>), 3.28-3.24 (m, 2H), 2.91-2.86 (m, 2H).

**Detectable signals of <sup>13</sup>C NMR (100 MHz, CDCl<sub>3</sub>)** δ 195.7, 195.6, 140.0, 139.9, 137.9, 135.8, 135.6, 134.5, 134.2, 131.0, 129.4, 129.0 (2C), 128.7, 128.6, 128.4 (3C), 114.3, 110.2, 78.6, 77.9, 34.1, 33.9, 26.4, 22.6. HRMS *m/z* (ESI) calcd. For C<sub>18</sub>H<sub>16</sub>ClN<sub>2</sub>O<sub>2</sub> (M + H)<sup>+</sup> 327.0895, found 327.0893.

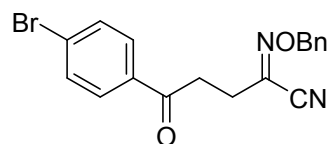

**3ao**, 51%

***N*-(benzyloxy)-4-(4-bromophenyl)-4-oxobutanimidoyl cyanide (3ao).**

57 mg (51%). 2.3:1 of two isomers, colorless oil; <sup>1</sup>H NMR: (400 MHz, CDCl<sub>3</sub>) δ 7.77 (d, *J* = 8.3 Hz, 2H), 7.63-7.55 (m, 2H), 7.41-7.25 (m, 5H),

5.26 (s, 2H<sub>minor</sub>), 5.17 (s, 2H<sub>major</sub>), 3.30-3.19 (m, 2H), 2.89-2.85 (m, 2H).

**Detectable signals of <sup>13</sup>C NMR (100 MHz, CDCl<sub>3</sub>)** δ 195.9, 195.7, 137.9, 135.8, 135.5, 134.8, 134.6, 131.9, 131.8, 130.9, 129.4, 128.6, 128.5(2C), 128.4, 128.3, 128.2, 114.2, 110.2, 78.5, 77.8, 34.0, 33.8, 26.3, 22.5. HRMS *m/z* (ESI) calcd. For C<sub>18</sub>H<sub>16</sub>BrN<sub>2</sub>O<sub>2</sub> (M + H)<sup>+</sup> 371.0390, found 371.0392.

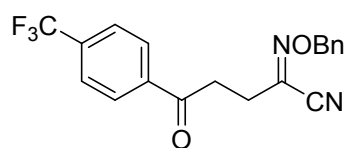

**3ap**, 49%

***N*-(benzyloxy)-4-oxo-4-(4-(trifluoromethyl)phenyl)butanimidoyl**

**cyanide (3ap)**. 53 mg (49%). 1.9:1 of two isomers, colorless oil; <sup>1</sup>H NMR: (400 MHz, CDCl<sub>3</sub>) δ 8.03-8.01 (m, 2H), 7.74-7.71 (m, 2H), 7.41-7.24 (m, 5H), 5.27 (s, 2H<sub>minor</sub>), 5.18 (s, 2H<sub>major</sub>), 3.34-3.29 (m, 2H), 2.93-2.89 (m, 2H). **Detectable signals of <sup>13</sup>C NMR (100 MHz, CDCl<sub>3</sub>)** δ 196.0, 195.9, 138.8, 138.5, 137.8, 135.8, 135.6, 135.1, 134.9, 134.7, 134.5, 134.4, 134.3, 134.1, 130.8, 129.2, 128.9, 128.8, 128.7, 128.6, 128.4 (2C), 128.3 (2C), 125.8 (2C), 125.7 (3C), 114.2, 110.2, 78.6, 77.8, 34.4, 34.3, 26.3, 22.5. <sup>19</sup>F NMR: (376 MHz, CDCl<sub>3</sub>) δ -63.1 (s, 3F<sub>minor</sub>), -63.1(s, 3F<sub>major</sub>); HRMS *m/z* (ESI) calcd. For C<sub>19</sub>H<sub>16</sub>F<sub>3</sub>N<sub>2</sub>O<sub>2</sub> (M + H)<sup>+</sup> 361.1158, found 361.1157.

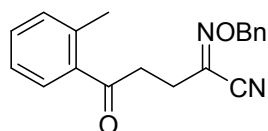

**3aq**, 46%

***N*-(benzyloxy)-4-oxo-4-(*o*-tolyl)butanimidoyl cyanide (3aq)**. 43 mg

(46%). 2.5:1 of two isomers, colorless oil;  $^1\text{H NMR}$ : (400 MHz,  $\text{CDCl}_3$ )  $\delta$  7.65-7.63 (m, 1H), 7.43-7.22 (m, 8H), 5.28 (s,  $2\text{H}_{\text{minor}}$ ), 5.20 (s,  $2\text{H}_{\text{major}}$ ), 3.25-3.20 (m, 2H), 2.91-2.81 (m, 2H), 2.50 (s,  $3\text{H}_{\text{minor}}$ ), 2.48 (s,  $3\text{H}_{\text{major}}$ ). **Detectable signals of  $^{13}\text{C NMR}$  (100 MHz,  $\text{CDCl}_3$ )**  $\delta$  200.3 (2C), 138.7, 138.5, 138.3, 136.9, 136.4, 135.9, 135.7, 132.2, 132.1, 131.8, 131.7, 131.2, 128.6 (4C), 128.5, 128.4, 128.3, 125.8, 125.7, 114.3, 110.3, 78.6, 77.8, 36.7, 36.3, 26.7, 22.7, 21.5, 21.4. HRMS  $m/z$  (ESI) calcd. For  $\text{C}_{19}\text{H}_{19}\text{N}_2\text{O}_2$  (M + H) $^+$  307.1441, found 307.1443.

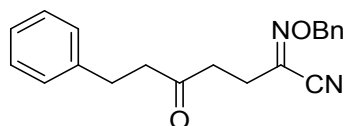

**3ar**, 63%

***N*-(benzyloxy)-4-oxo-6-phenylhexanimidoyl cyanide (3ar)**. 61 mg (63%). 1.9:1 of two isomers, colorless oil;  $^1\text{H NMR}$ : (400 MHz,  $\text{CDCl}_3$ )  $\delta$  7.43-7.22 (m, 7H), 7.20-7.14 (m, 3H), 5.23 (s,  $2\text{H}_{\text{minor}}$ ), 5.17 (s,  $2\text{H}_{\text{major}}$ ), 2.91-2.84 (m, 2H), 2.77-2.60 (m, 6H). **Detectable signals of  $^{13}\text{C NMR}$  (100 MHz,  $\text{CDCl}_3$ )**  $\delta$  206.7, 206.5, 140.6, 140.5, 137.9, 135.9, 135.6, 131.0, 128.6, 128.5 (2C), 128.4, 128.3 (2C), 128.2 (2C), 126.1, 114.1, 110.1, 78.4, 77.7, 44.1, 44.0, 37.9, 37.7, 29.5, 29.4, 26.0, 22.0. HRMS  $m/z$  (ESI) calcd. For  $\text{C}_{20}\text{H}_{21}\text{N}_2\text{O}_2$  (M + H) $^+$  321.1598, found 321.1596.

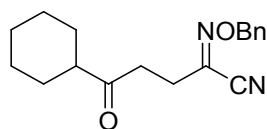

**3as**, 52%

***N*-(benzyloxy)-4-cyclohexyl-4-oxobutananimidoyl cyanide (3as)**. 47 mg

(52%). 9.6:1 of two isomers, colorless oil; **major isomer:  $^1\text{H}$  NMR: (400 MHz,  $\text{CDCl}_3$ )  $\delta$  7.38-7.31 (m, 5H), 5.21 (s, 2H), 2.81-2.65 (m, 4H), 1.86-1.63 (m, 5H), 1.41-1.10 (m, 6H).  $^{13}\text{C}$  NMR (100 MHz,  $\text{CDCl}_3$ )  $\delta$  210.6, 136.0, 131.3, 128.5, 128.4, 128.3, 110.2, 77.8, 50.7, 35.9, 28.4, 26.1, 25.7, 25.5. HRMS  $m/z$  (ESI) calcd. For  $\text{C}_{18}\text{H}_{23}\text{N}_2\text{O}_2$  ( $\text{M} + \text{H}$ ) $^+$  299.1754, found 299.1756.**

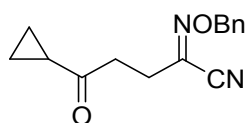

**3at**, 49%

***N*-(benzyloxy)-4-cyclopropyl-4-oxobutananimidoyl cyanide (3at).** 38 mg (49%). 2.2:1 of two isomers, colorless oil;  **$^1\text{H}$  NMR: (400 MHz,  $\text{CDCl}_3$ )  $\delta$  7.38-7.33 (m, 5H), 5.25 (s,  $2\text{H}_{\text{minor}}$ ), 5.22 (s,  $2\text{H}_{\text{major}}$ ), 2.92-2.87 (m, 2H), 2.74-2.70 (m, 2H), 1.95-1.88 (m, 1H), 1.07-1.00 (m, 2H), 0.92-0.87 (m, 2H). Detectable signals of  $^{13}\text{C}$  NMR (100 MHz,  $\text{CDCl}_3$ )  $\delta$  207.6, 207.4, 138.2, 135.9, 135.7, 131.2, 128.6, 128.5 (3C), 128.3 (2C), 114.1, 110.2, 78.5, 77.8, 38.6, 38.2, 26.2, 22.2, 20.5, 20.4, 11.1, 10.9. HRMS  $m/z$  (ESI) calcd. For  $\text{C}_{15}\text{H}_{17}\text{N}_2\text{O}_2$  ( $\text{M} + \text{H}$ ) $^+$  257.1285, found 257.1283.**

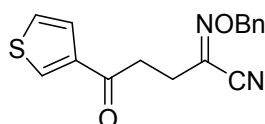

**3au**, 49%

***N*-(benzyloxy)-4-oxo-4-(thiophen-3-yl)butanimidoyl cyanide (3au).** 38 mg (49%). 2.0:1 of two isomers, colorless oil;  **$^1\text{H}$  NMR: (400 MHz,  $\text{CDCl}_3$ )  $\delta$  8.05-8.03 (m, 1H), 7.54-7.51 (m, 1H), 7.36-7.30 (m, 6H), 5.27**

(s, 2H<sub>minor</sub>), 5.19 (s, 2H<sub>major</sub>), 3.21-3.18 (m, 2H), 2.88-2.84 (m, 2H).

**Detectable signals of <sup>13</sup>C NMR (100 MHz, CDCl<sub>3</sub>)** δ<sup>13</sup>C NMR (101 MHz, CDCl<sub>3</sub>) δ 191.1 (2C), 141.4, 141.2, 138.0, 135.8, 135.6, 132.3, 132.2, 131.1, 128.6 (3C), 128.4 (2C), 128.3, 126.7, 126.6 (3C), 114.3, 110.2, 78.5, 77.8, 35.3, 34.9, 26.3, 22.6. HRMS *m/z* (ESI) calcd. For C<sub>16</sub>H<sub>15</sub>N<sub>2</sub>O<sub>2</sub>S (M + H)<sup>+</sup> 299.0849, found 299.0846.

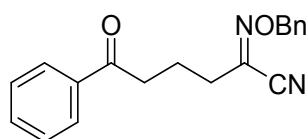

**3av**, 46%

***N*-(benzyloxy)-5-oxo-5-phenylpentanimidoyl cyanide (3av)**. 43 mg (46%). 1:2.1 of two isomers, colorless oil; <sup>1</sup>H NMR: (400 MHz, CDCl<sub>3</sub>) δ 7.91-7.88 (m, 2H), 7.58-7.54 (m, 1H), 7.47-7.43 (m, 2H), 7.35-7.26 (m, 5H), 5.21 (s, 2H<sub>major</sub>), 5.18 (s, 2H<sub>minor</sub>), 3.00-2.94 (m, 2H), 2.63-2.52 (m, 2H), 2.11-2.04 (m, 2H). **Detectable signals of <sup>13</sup>C NMR (100 MHz, CDCl<sub>3</sub>)** δ 198.6, 198.4, 138.7, 136.5 (2C), 136.0, 135.6, 133.1, 132.0, 128.6 (2C), 128.5 (4C), 128.4, 128.3, 127.9, 127.8, 114.4, 110.3, 78.3, 77.7, 36.9, 36.5, 31.3, 27.2, 20.2, 19.6. HRMS *m/z* (ESI) calcd. For C<sub>19</sub>H<sub>19</sub>N<sub>2</sub>O<sub>2</sub> (M + H)<sup>+</sup> 307.1441, found 307.1445.

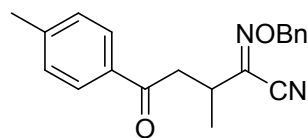

**3aw**, 36%

***N*-(benzyloxy)-2-methyl-4-oxo-4-(*p*-tolyl)butanimidoyl cyanide (3aw)**. 35 mg (36%). colorless oil; **Major isomer** : <sup>1</sup>H NMR: (400 MHz, CDCl<sub>3</sub>)

$\delta$  7.83 (d,  $J$  = 8.1 Hz, 2H), 7.37-7.26 (m, 7H), 5.18 (s, 2H), 3.43-3.31 (m, 2H), 3.07-2.98 (m, 1H), 2.42 (s, 3H), 1.30 (d,  $J$  = 6.7 Hz, 3H).  $^{13}\text{C}$  NMR (100 MHz,  $\text{CDCl}_3$ )  $\delta$  196.4, 144.2, 136.1, 135.9, 134.1, 129.3, 128.4 (2C), 128.3, 128.1, 109.8, 77.8, 41.6, 32.8, 21.7, 18.2. HRMS  $m/z$  (ESI) calcd. For  $\text{C}_{20}\text{H}_{21}\text{N}_2\text{O}_2$  ( $\text{M} + \text{H}$ ) $^+$  321.1598, found 321.1596.

### 3.3 Radical-capturing experiments

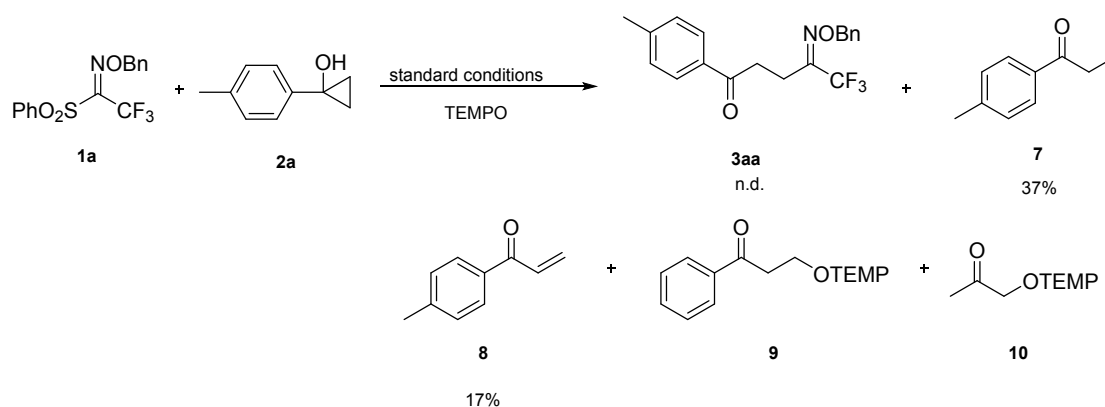

A mixture of  $\text{CF}_3$ -containing sulfonyl oxime ethers (**1a**) (0.3 mmol, 103 mg), cyclopropanols (**2a**) (0.45 mmol, 67 mg),  $\text{AgNO}_3$  (0.06 mmol, 10.2 mg) and  $\text{K}_2\text{S}_2\text{O}_8$  (0.45 mmol, 122 mg), TEMPO (4 eq. 187 mg) in acetone: $\text{H}_2\text{O}$  (1:1, 2 mL) was stirred at 50 °C for 2 h (monitored by TLC). After it was cooled down to room temperature, the mixture was poured into water (15 mL) and was extracted with EtOAc (3 x 15 mL). The combined organic layers were washed with brine (2 x 15 mL) and dried over  $\text{MgSO}_4$ . The solvent was removed by vacuum and the residue was purified by preparative thin layer chromatography (PTLC) (5% acetone in PE) to give



the corresponding products.

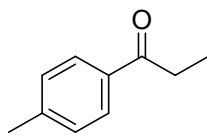

7

**1-(*p*-tolyl)propan-1-one (7).** colorless oil; The data is in accordance with reported lit. 3. **<sup>1</sup>H NMR: (400 MHz, CDCl<sub>3</sub>)**  $\delta$  7.86 (d, *J* = 8.2 Hz, 2H), 7.27-7.22 (m, 2H), 2.97 (d, *J* = 7.3 Hz, 2H), 2.40 (s, 3H), 1.21 (t, *J* = 7.3 Hz, 3H).

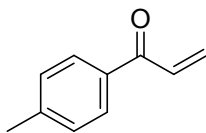

8

**1-(*p*-tolyl)prop-2-en-1-one (8).** colorless oil; The data is in accordance with reported lit. 4. **<sup>1</sup>H NMR: (400 MHz, CDCl<sub>3</sub>)**  $\delta$  7.87 (d, *J* = 8.1 Hz, 2H), 7.32-7.25 (m, 2H), 7.17 (dd, *J* = 17.1, 10.5 Hz, 1H), 6.43 (dd, *J* = 17.0, 1.8 Hz, 1H), 5.90 (dd, *J* = 10.6, 1.8 Hz, 1H), 2.42 (s, 3H).

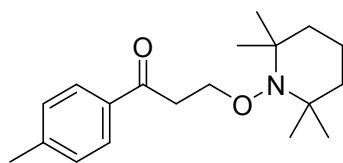

9

**3-((2,2,6,6-tetramethylpiperidin-1-yl)oxy)-1-(*p*-tolyl)propan-1-one (9).** colorless oil; The data is in accordance with reported lit. 5. **<sup>1</sup>H NMR: (400 MHz, CDCl<sub>3</sub>)**  $\delta$  7.90 (d, *J* = 7.7 Hz, 2H), 7.27 (d, *J* = 7.8 Hz, 2H), 4.14 (t, *J* = 6.6 Hz, 2H), 3.14 (t, *J* = 6.6 Hz, 2H), 2.42 (s, 3H), 1.47-1.1.42 (m, 6H), 1.16-1.01 (m, 12H).

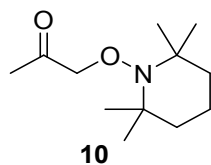

**1-((2,2,6,6-tetramethylpiperidin-1-yl)oxy)propan-2-one (10).** colorless oil; The data is in accordance with reported lit. 6. **<sup>1</sup>H NMR: (400 MHz, CDCl<sub>3</sub>)**  $\delta$  4.38 (s, 2H), 2.21 (s, 3H), 1.47-1.42 (m, 6H), 1.16-1.01 (m, 12H).

## 4. Reference

- [1] (a) S. Kim and R. Kavali, *Tetrahedron Lett.* 2002, **43**, 7189; (b) S. Kim, I. Y. Lee, J.-Y. Yoon and D. H. Oh, *J. Am. Chem. Soc.* 1996, **118**, 5138; (c) S. Kim, N. A. B. Kamaldin, S. Kang and S. Kim, *Chem. Commun.* 2010, **46**, 7822; (d) B. Gaspar and E. M. Carreira, *J. Am. Chem. Soc.* 2009, **131**, 13214.
- [2] (a) J. K. Cha and O. G. Kulinkovich, *Org. React.* 2012, **77**, 1; (b) X.-P. He, Y.-J. Shu, J.-J. Dai, W.-M. Zhang, Y.-S. Feng and H.-J. Xu, *Org. Biomol. Chem.*, 2015, **13**, 7159; (c) Y. Li, Z. Ye, T. M. Bellman, T. Chi and M. Dai, *Org. Lett.*, 2015, **17**, 2186; (d) S. Ren, C. Feng and T.-P. Loh, *Org. Biomol. Chem.*, 2015, **13**, 5105; (e) H. Zhao, X. Fan, J. Yu and C. Zhu, *J. Am. Chem. Soc.*, 2015, **137**, 3490; (f) B. Xu, D. Wang, Y. Hu and Q. Shen, *Org. Chem. Front.*, 2018, **5**, 1462.
- [3] Q. Tong, Y. Liu, X. Gao, Z. Fan, T. Liu, B. Li, D. Su, Q. Wang and M. Cheng, *Adv. Synth. Catal.*, 2019, **361**, 3137.
- [4] F. Verma, P. Shukla, S. R. Bhardiya, M. Singh, A. Rai and V. K. Rai, *Adv. Synth. Catal.*, 2019, **361**, 1247.
- [5] K. Jia, F. Zhang, H. Huang and Y. Chen. *J. Am. Chem. Soc.*, 2016, **138**, 1514.
- [6] Y. Li, M. Pouliot, T. Vogler, P. Renaud and A. Studer, *Org. Lett.*, 2012, **14**, 4474.

## 5. $^1\text{H}$ NMR and $^{13}\text{C}$ NMR spectra of compounds 3aa-i, 3am-w

### $^1\text{H}$ NMR spectrum of 3aa

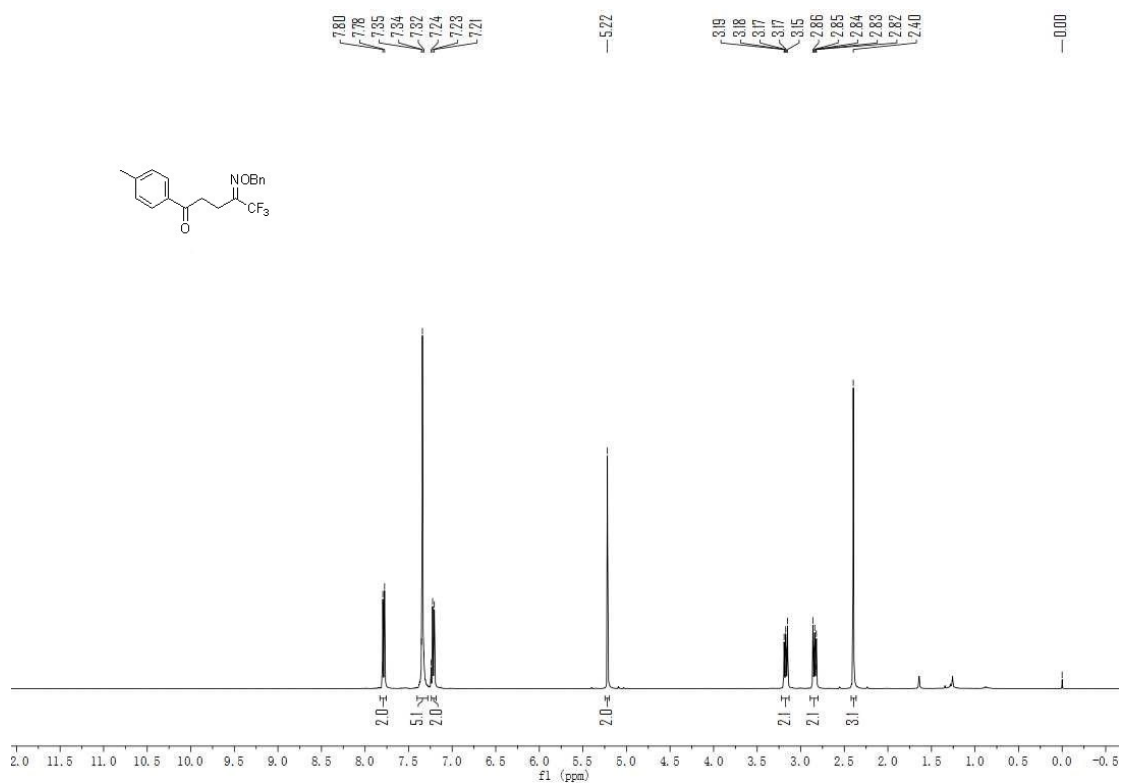

### $^{13}\text{C}$ NMR spectrum of 3aa

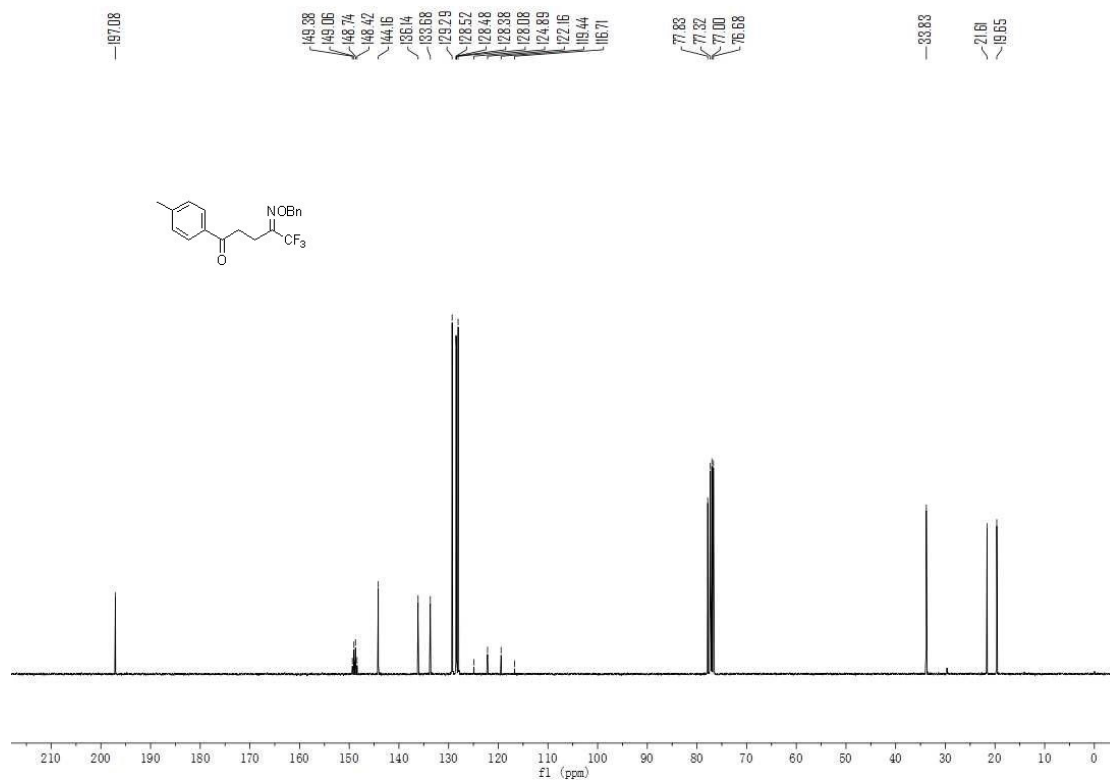

### <sup>19</sup>F NMR spectrum of 3aa

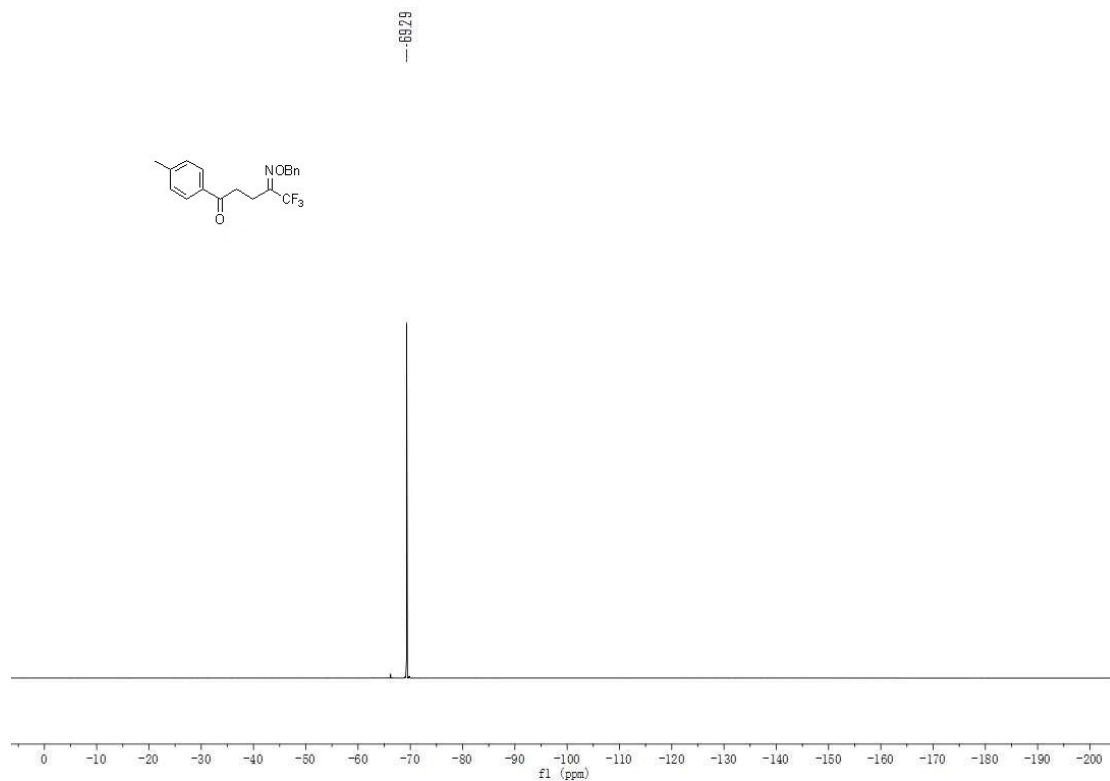

### <sup>1</sup>H NMR spectrum of 3ab

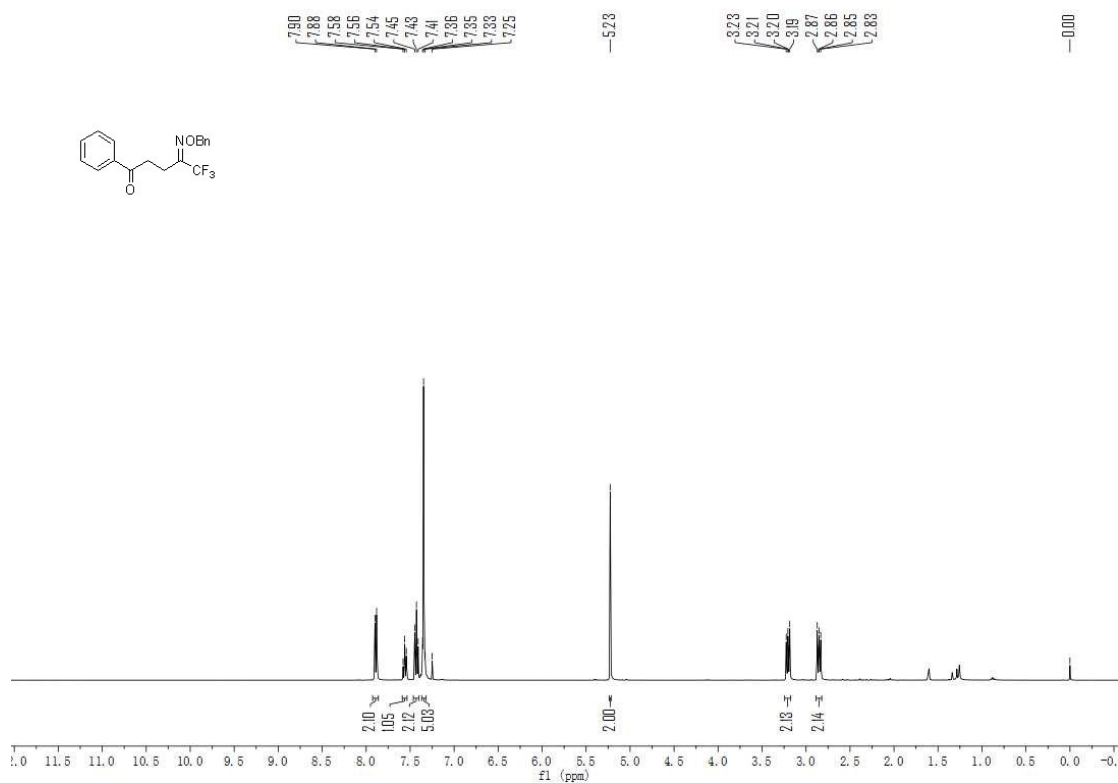

### <sup>13</sup>C NMR spectrum of 3ab

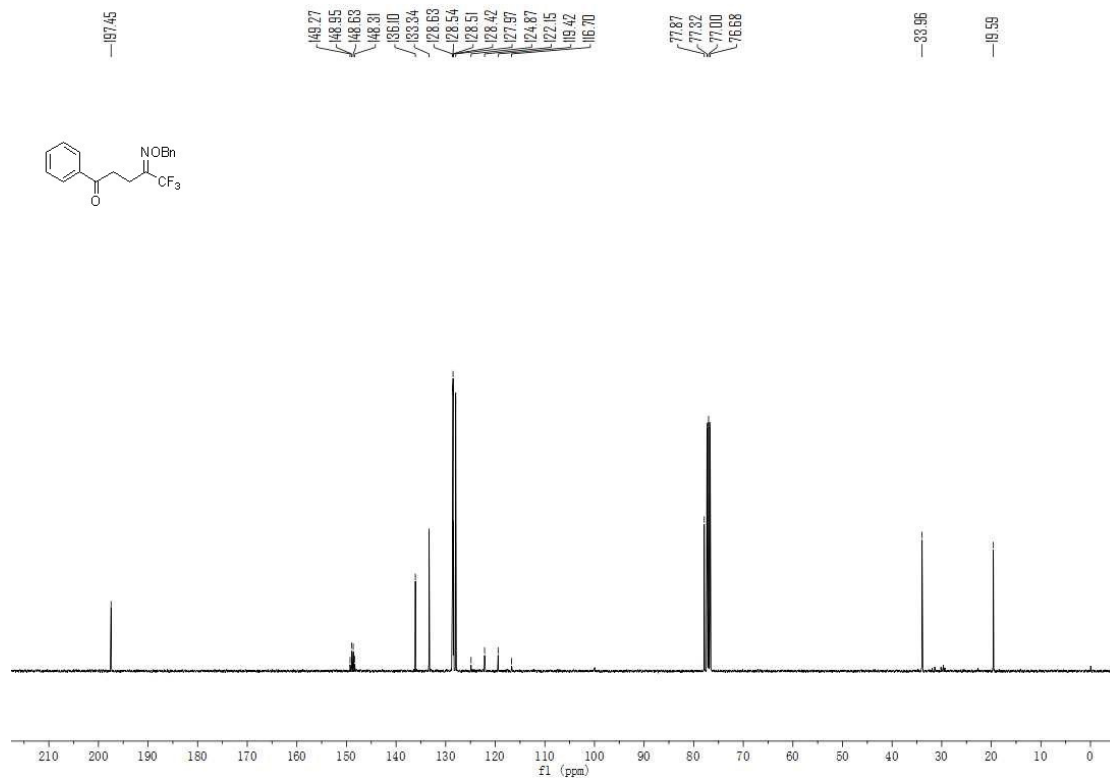

### <sup>19</sup>F NMR spectrum of 3ab

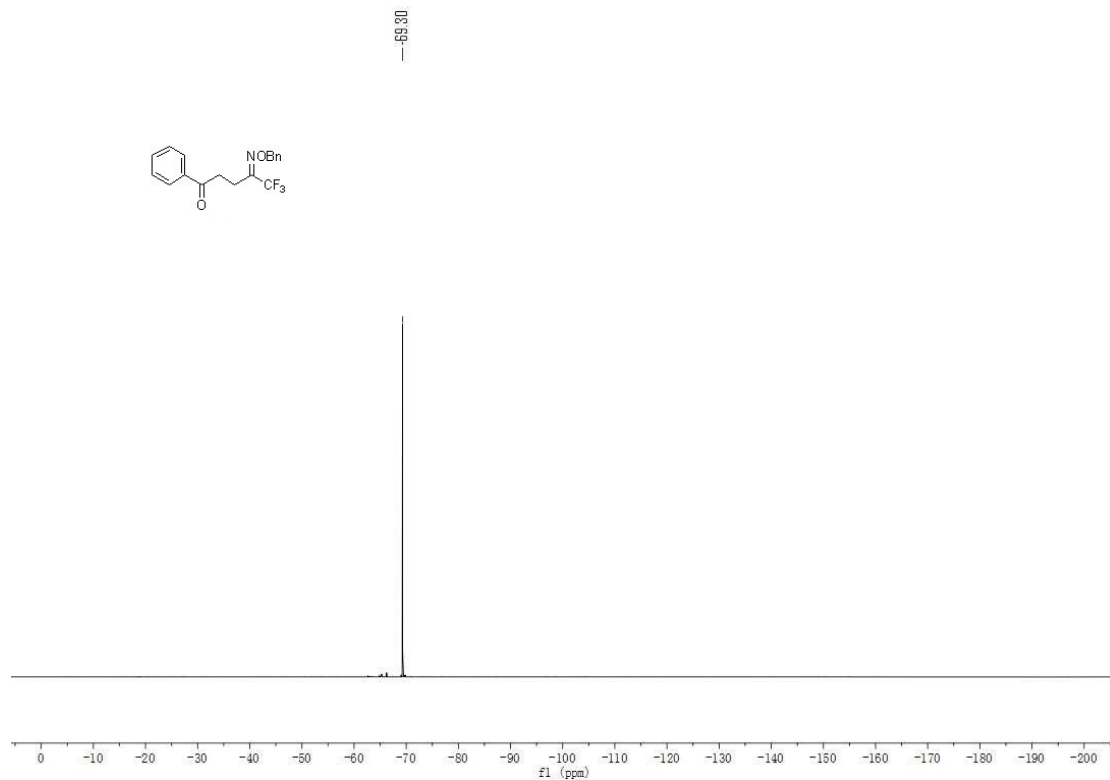

# <sup>1</sup>H NMR spectrum of 3ac

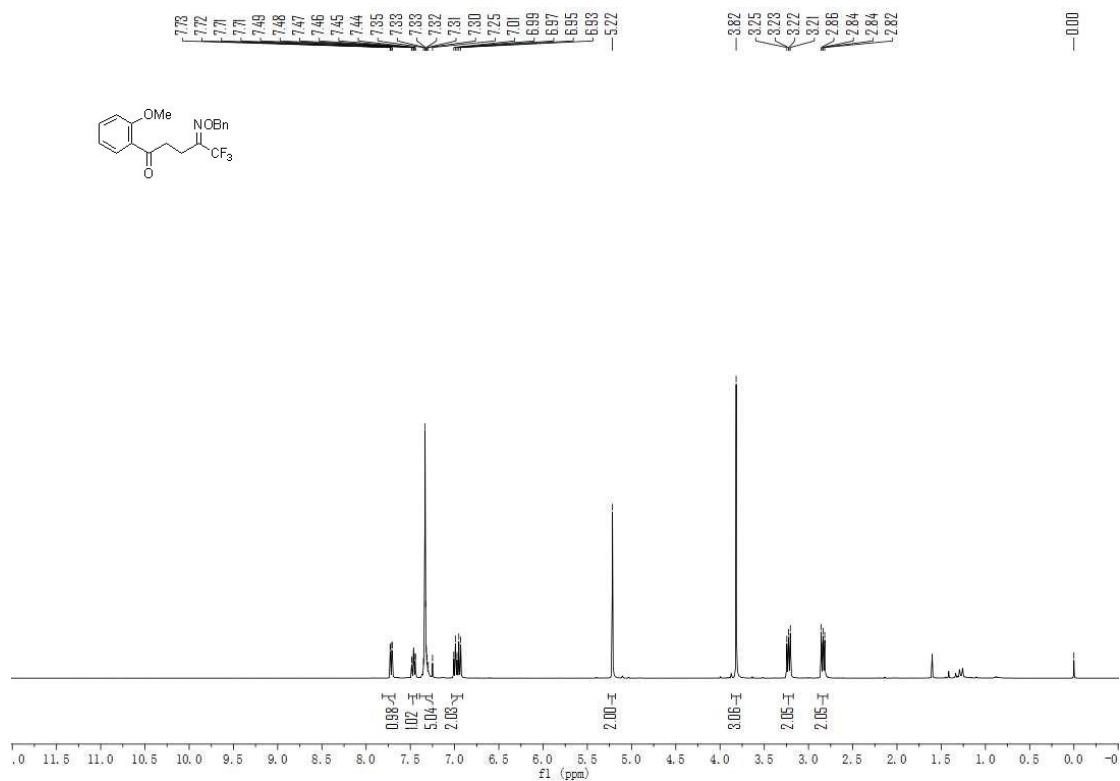

# <sup>13</sup>C NMR spectrum of 3ac

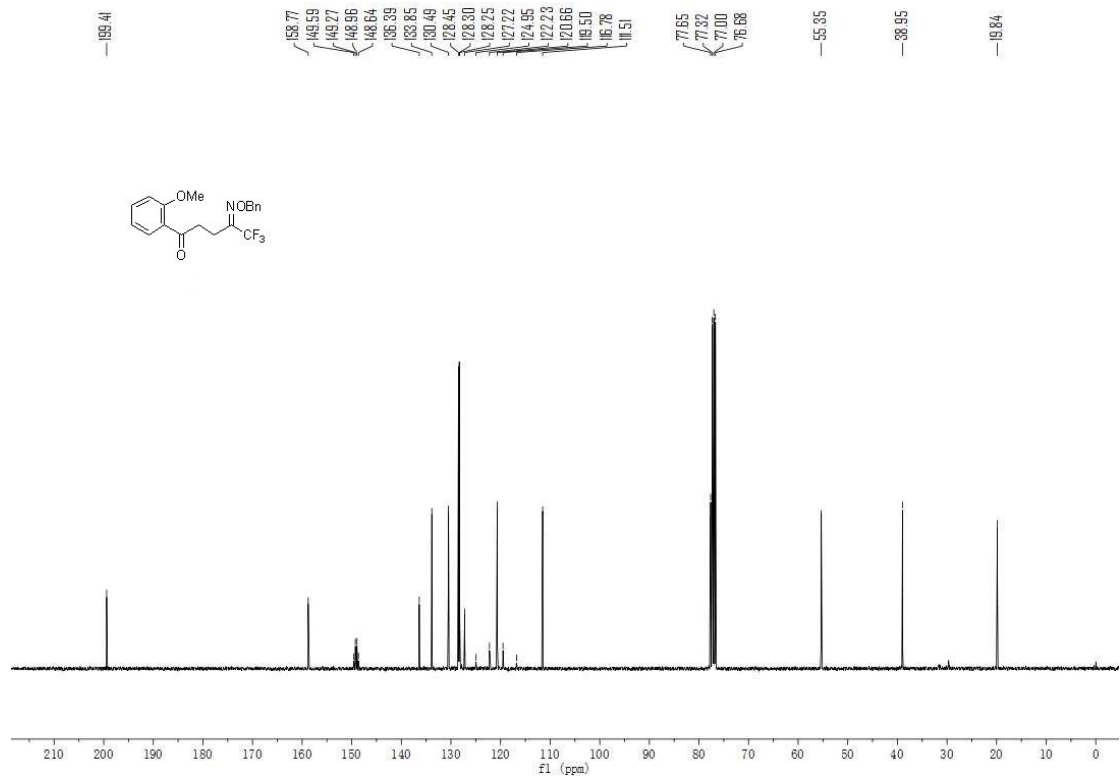

# <sup>19</sup>F NMR spectrum of 3ac

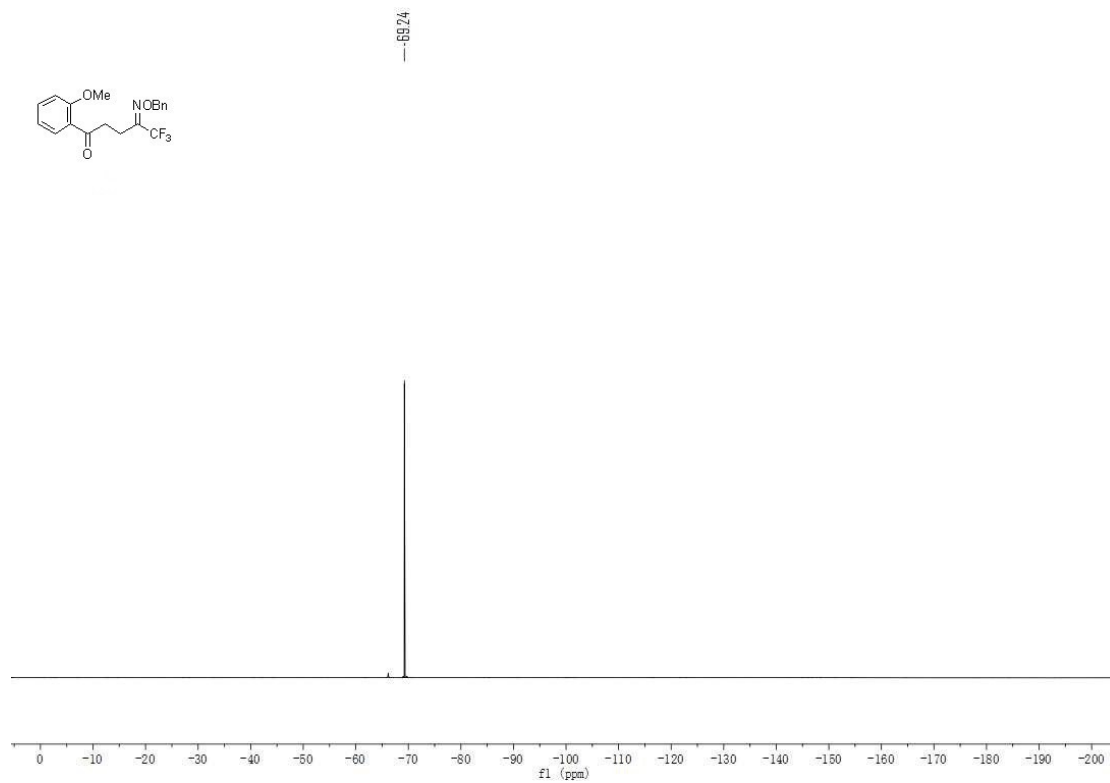

# <sup>1</sup>H NMR spectrum of 3ad

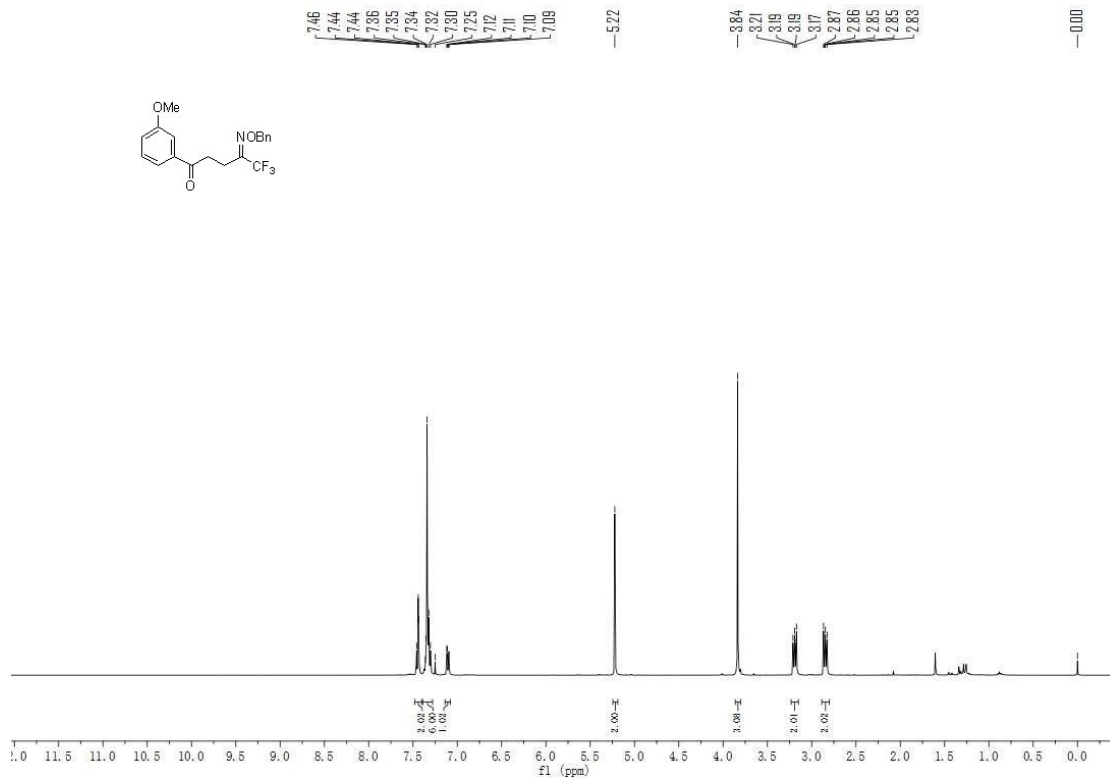



### <sup>13</sup>C NMR spectrum of 3ad

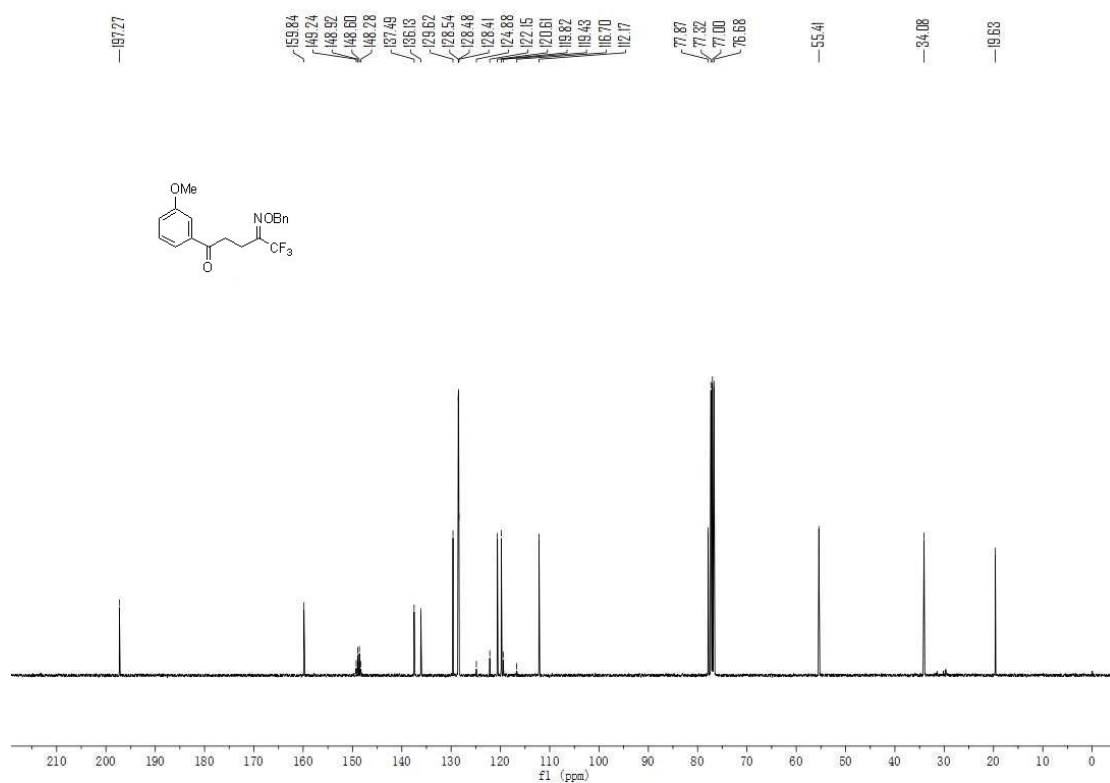

### <sup>19</sup>F NMR spectrum of 3ad

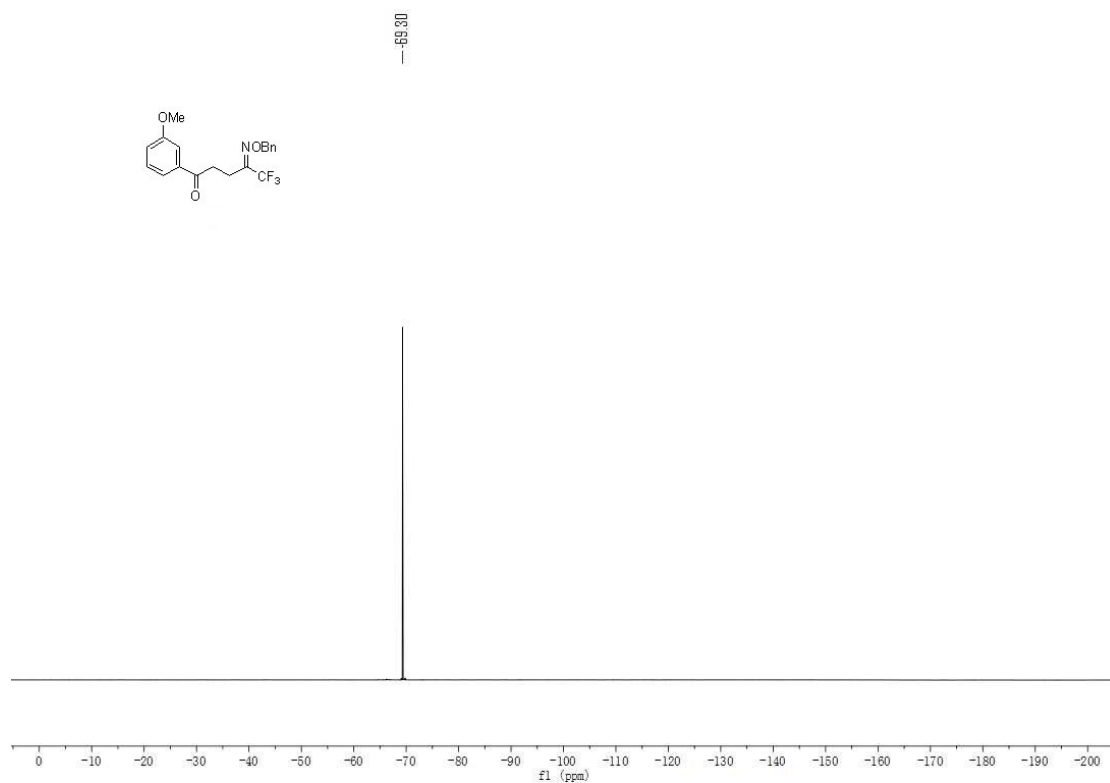

# <sup>1</sup>H NMR spectrum of 3ae

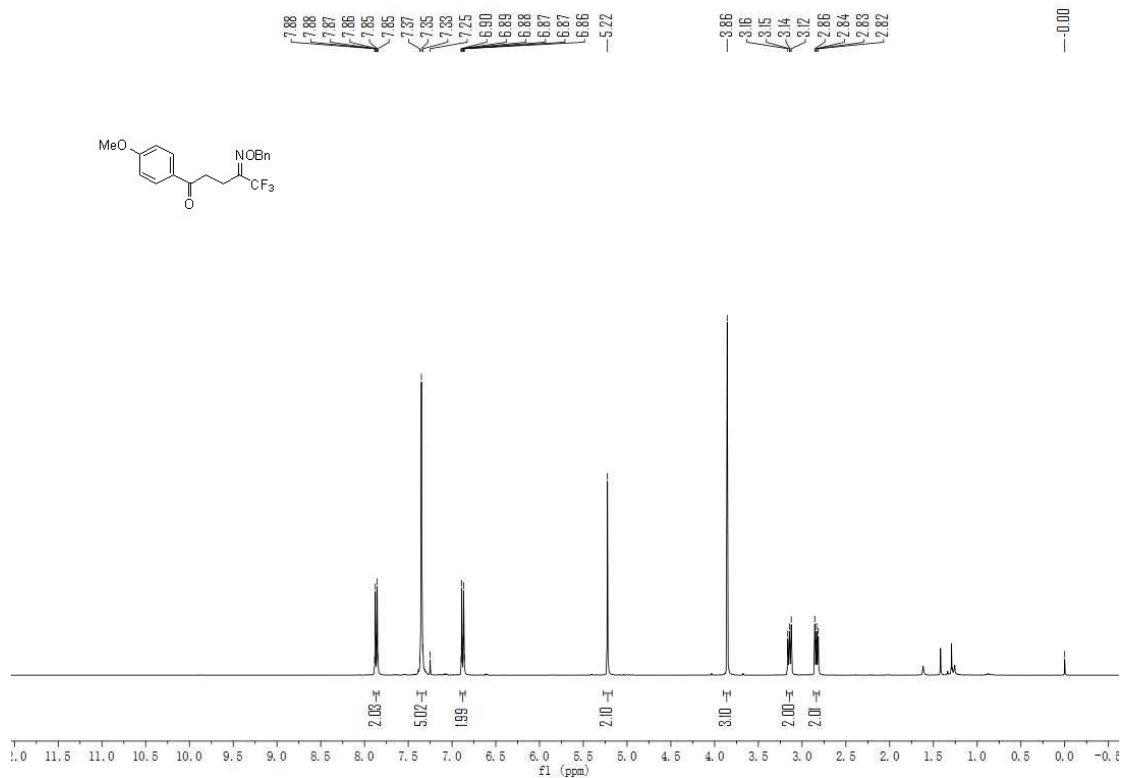

# <sup>13</sup>C NMR spectrum of 3ae

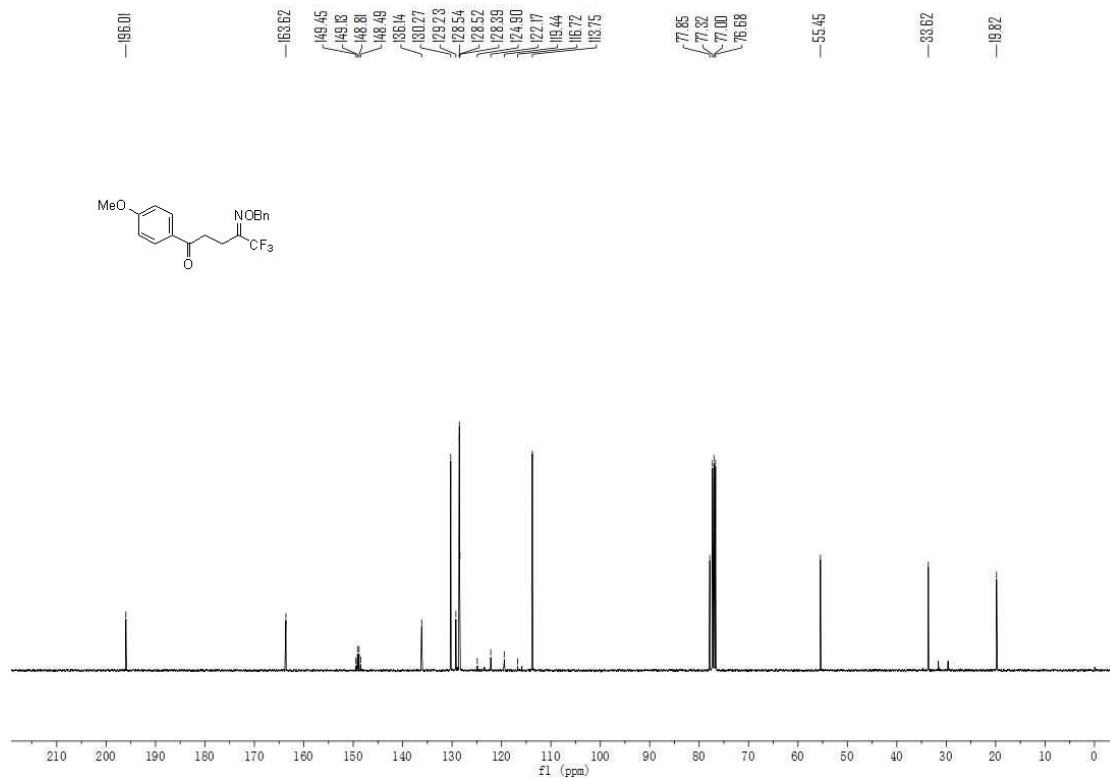



### <sup>13</sup>C NMR spectrum of 3af

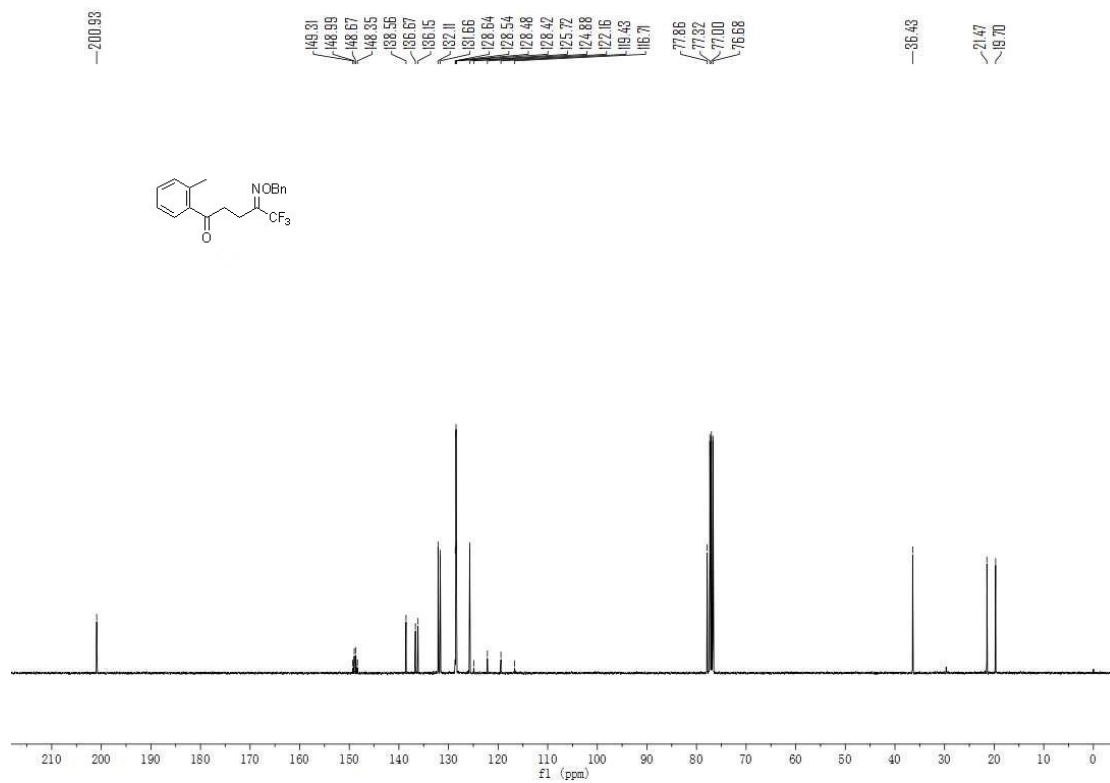

### <sup>19</sup>F NMR spectrum of 3af

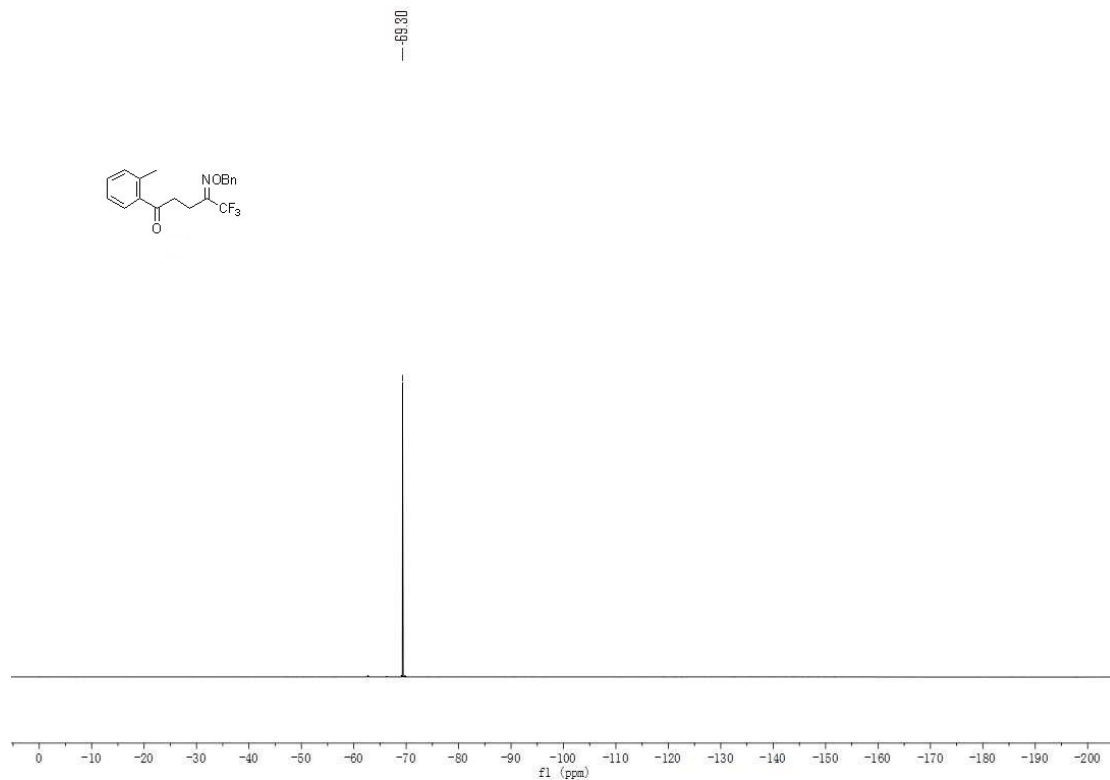

# <sup>1</sup>H NMR spectrum of 3ag

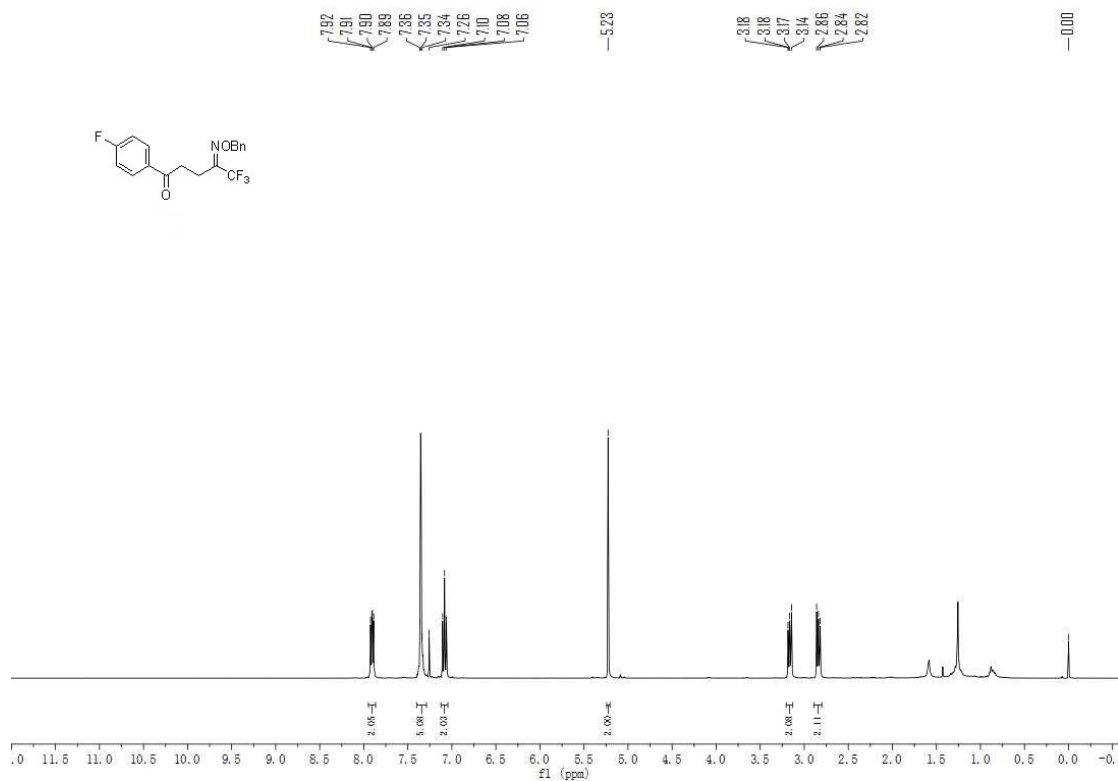

# <sup>13</sup>C NMR spectrum of 3ag

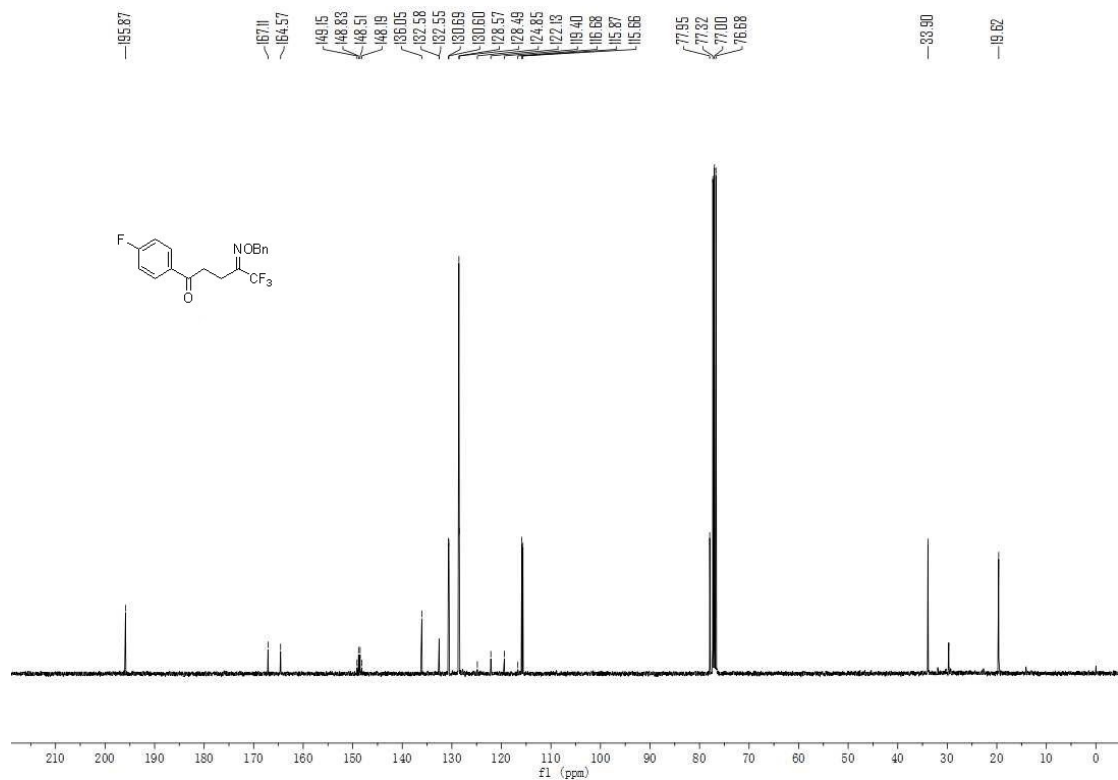

### <sup>19</sup>F NMR spectrum of 3ag

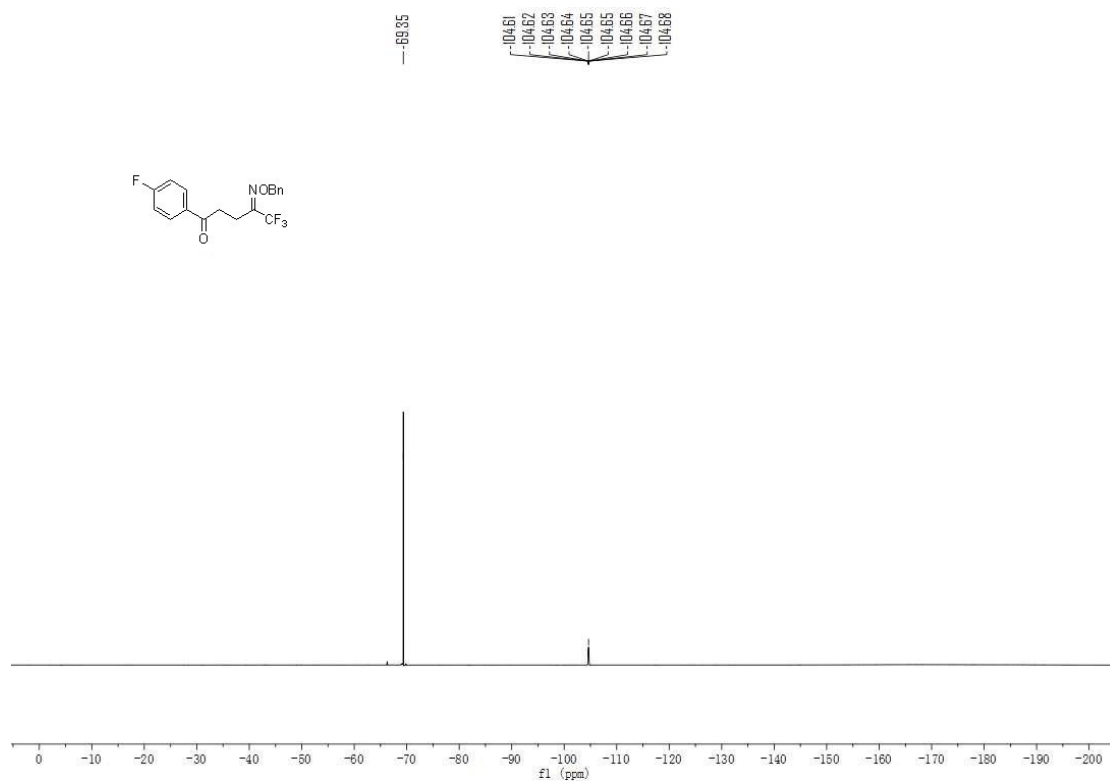

### <sup>1</sup>H NMR spectrum of 3ah

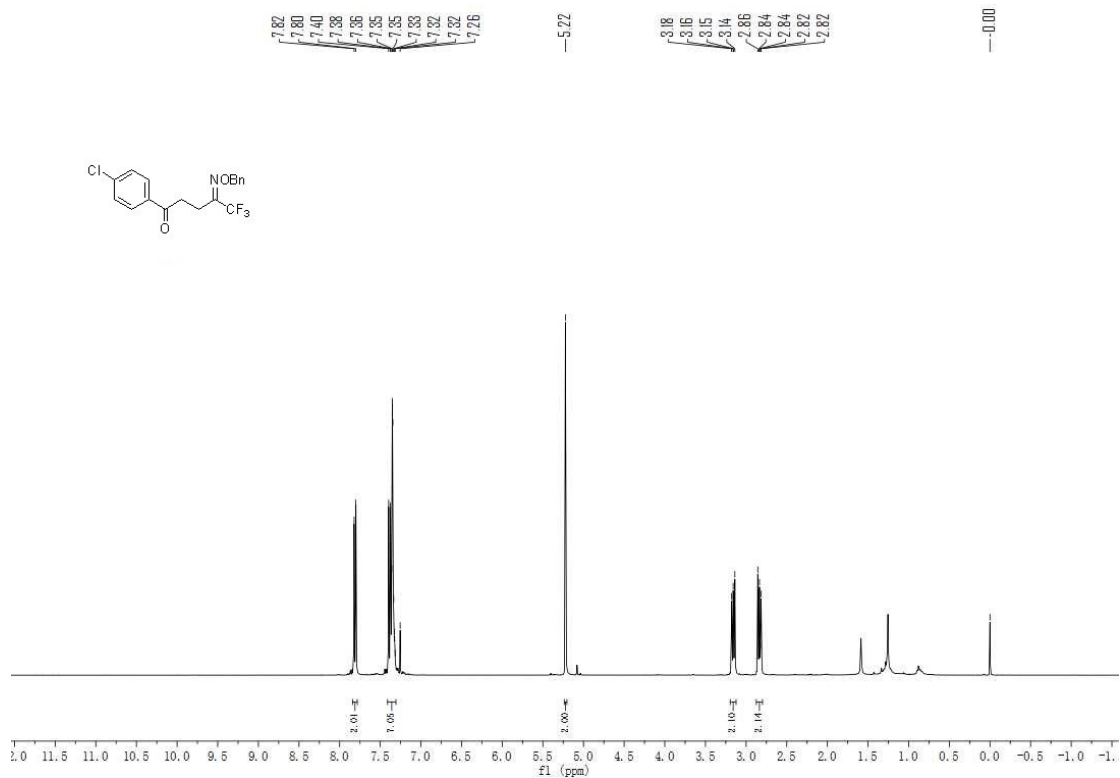

### <sup>13</sup>C NMR spectrum of 3ah

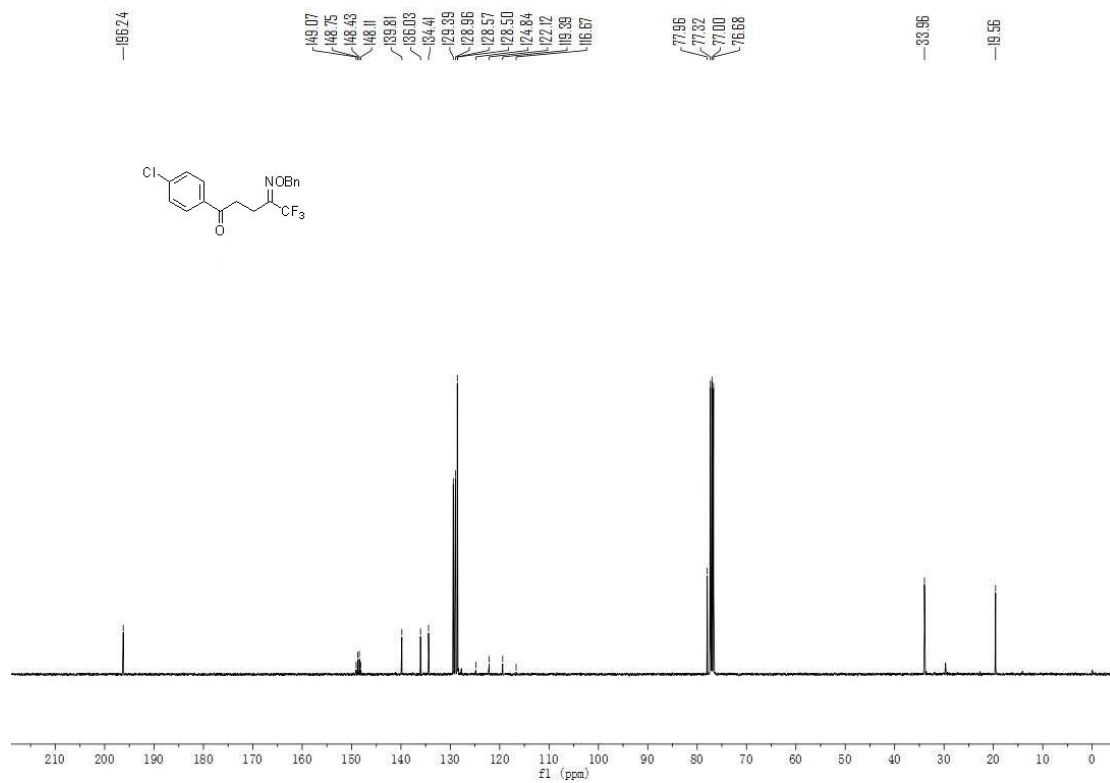

### <sup>19</sup>F NMR spectrum of 3ah

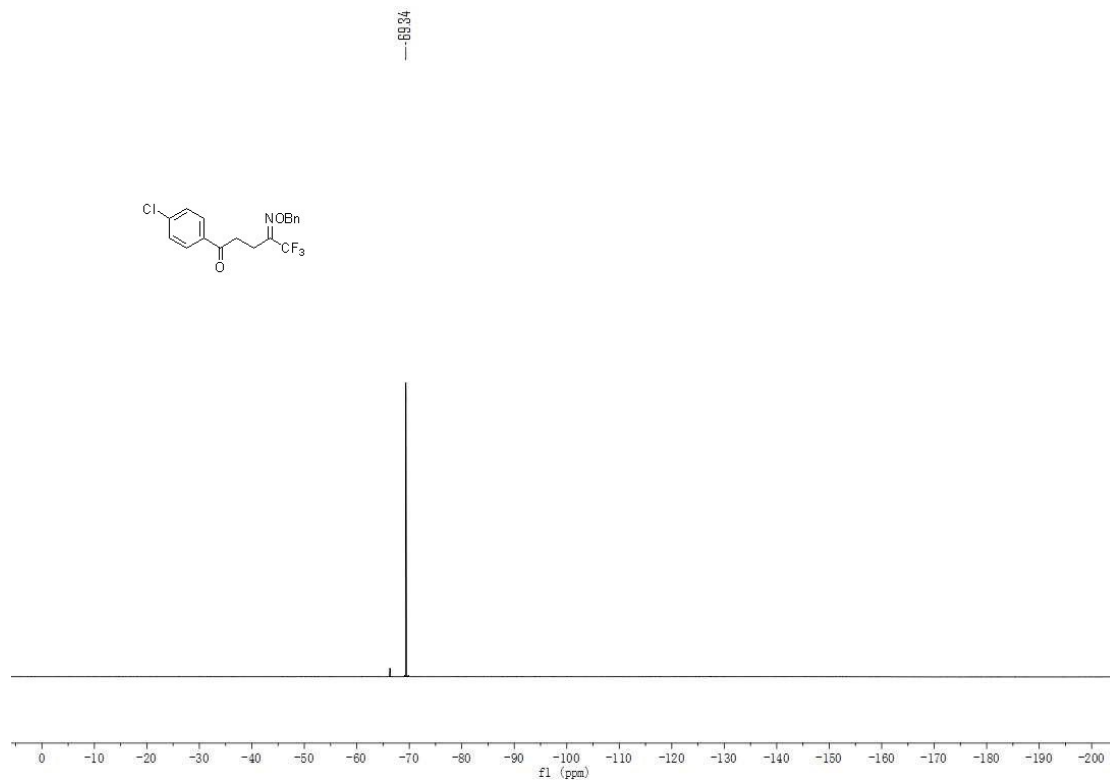

# <sup>1</sup>H NMR spectrum of 3ai

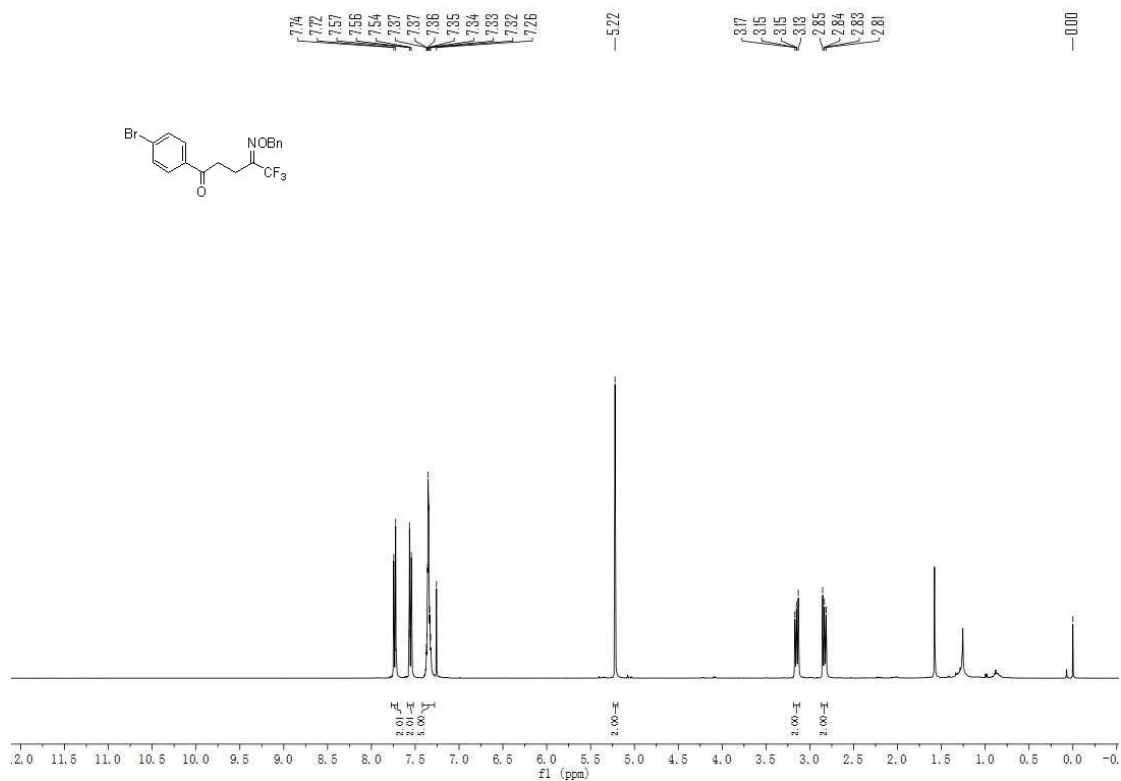

# <sup>13</sup>C NMR spectrum of 3ai

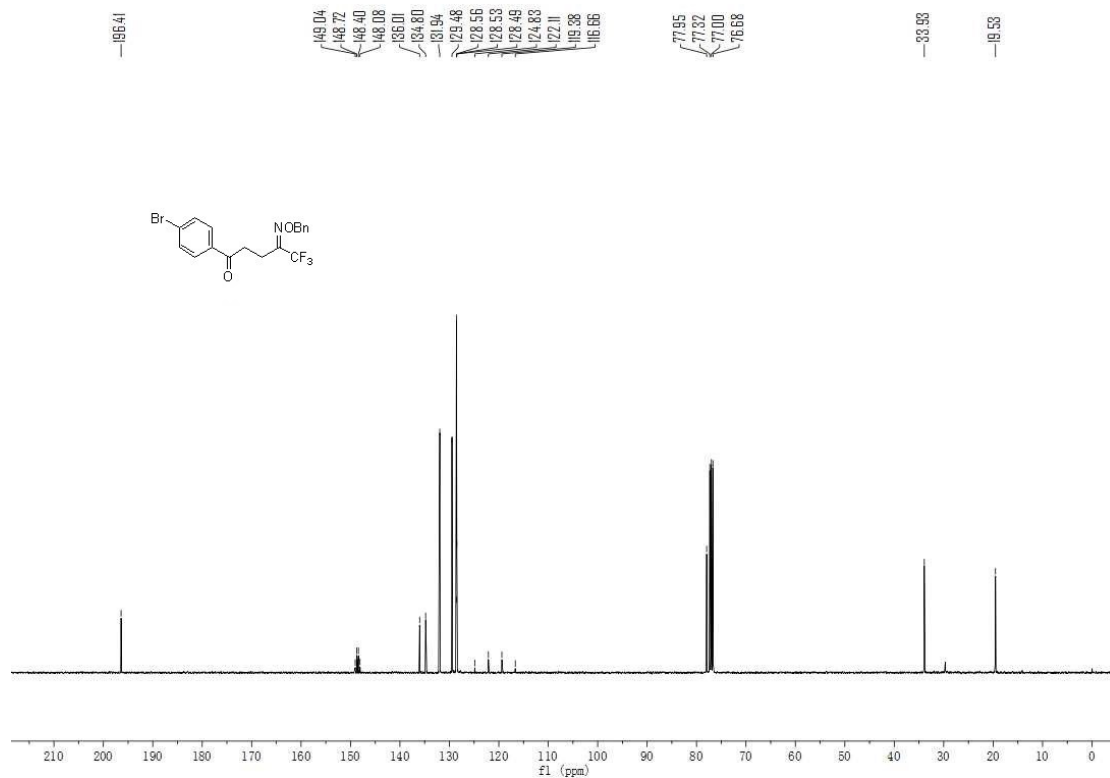



## <sup>19</sup>F NMR spectrum of 3ai

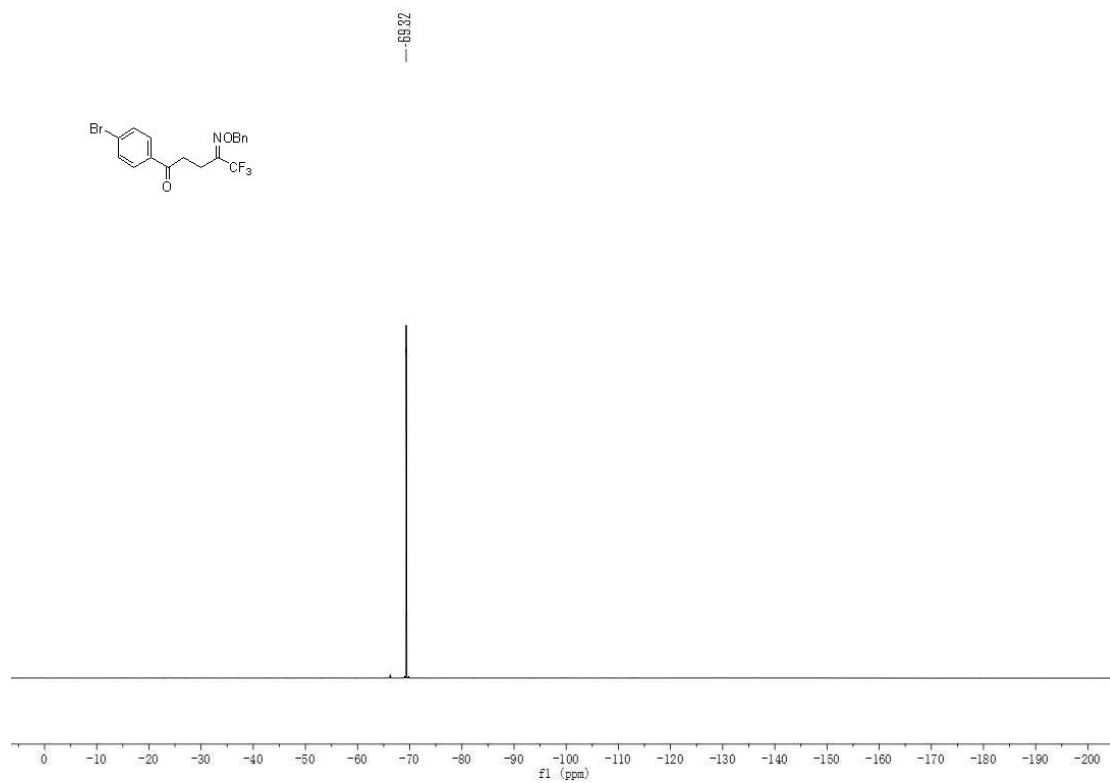

## <sup>1</sup>H NMR spectrum of 3aj

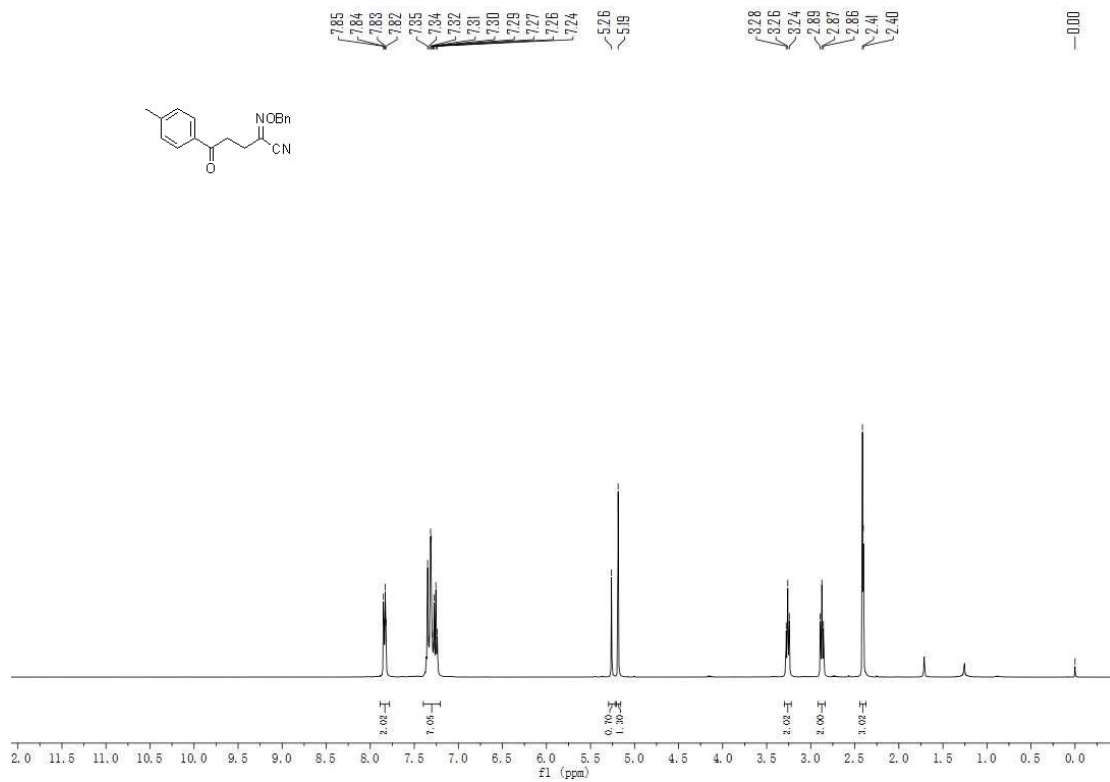

### <sup>13</sup>C NMR spectrum of 3aj

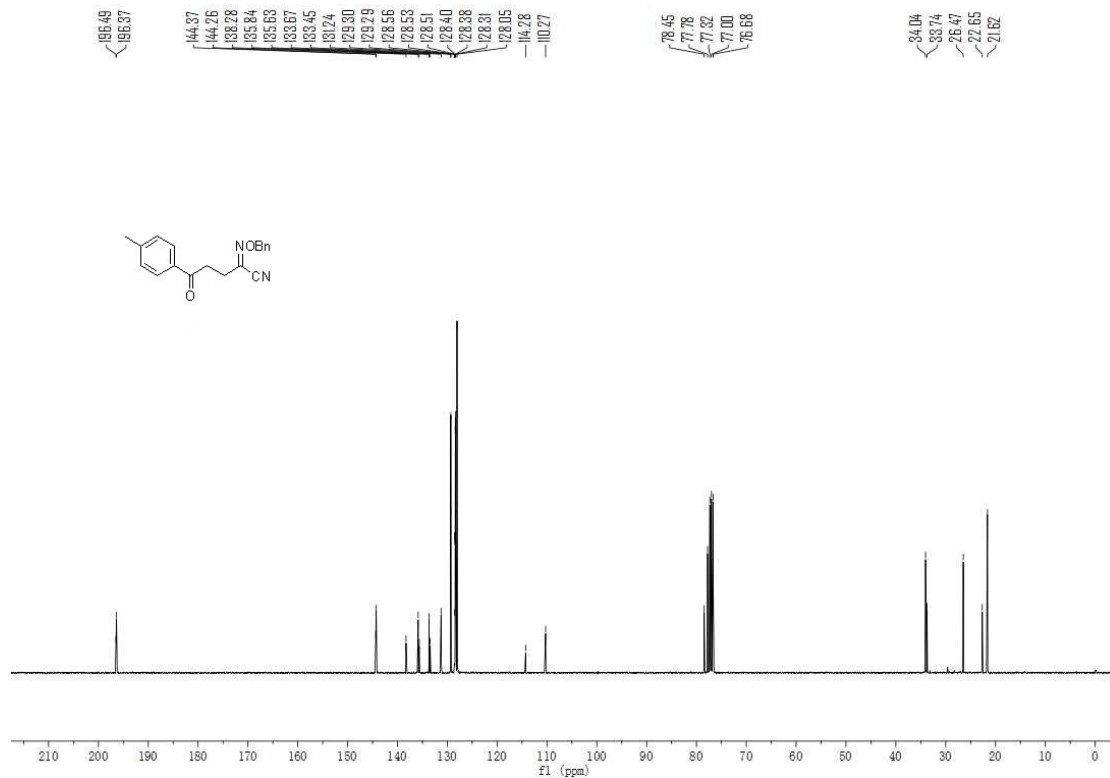

### <sup>1</sup>H NMR spectrum of 3ak

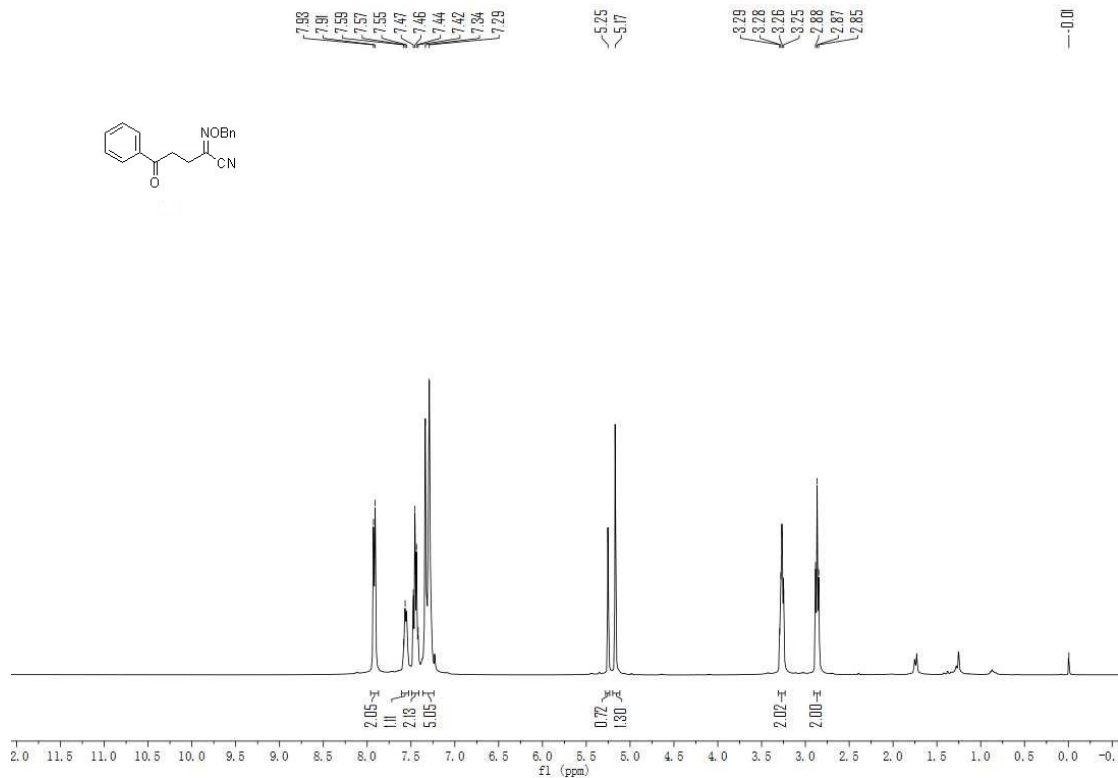

### <sup>13</sup>C NMR spectrum of 3ak

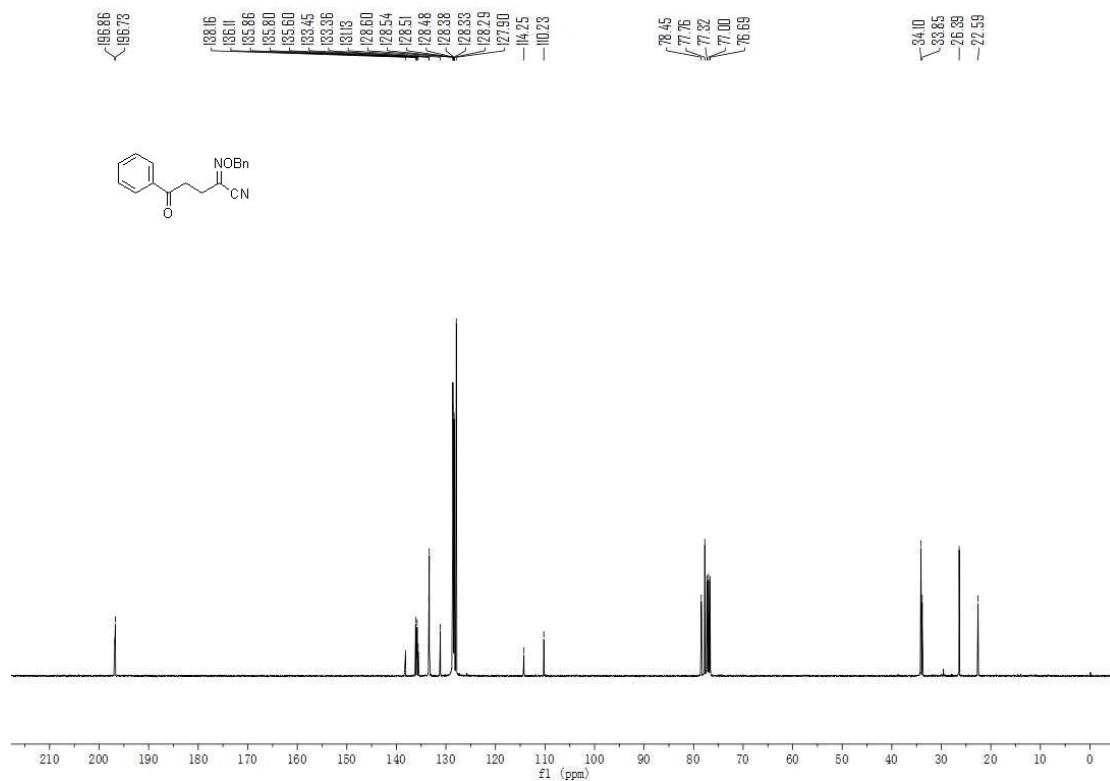

### <sup>1</sup>H NMR spectrum of 3al

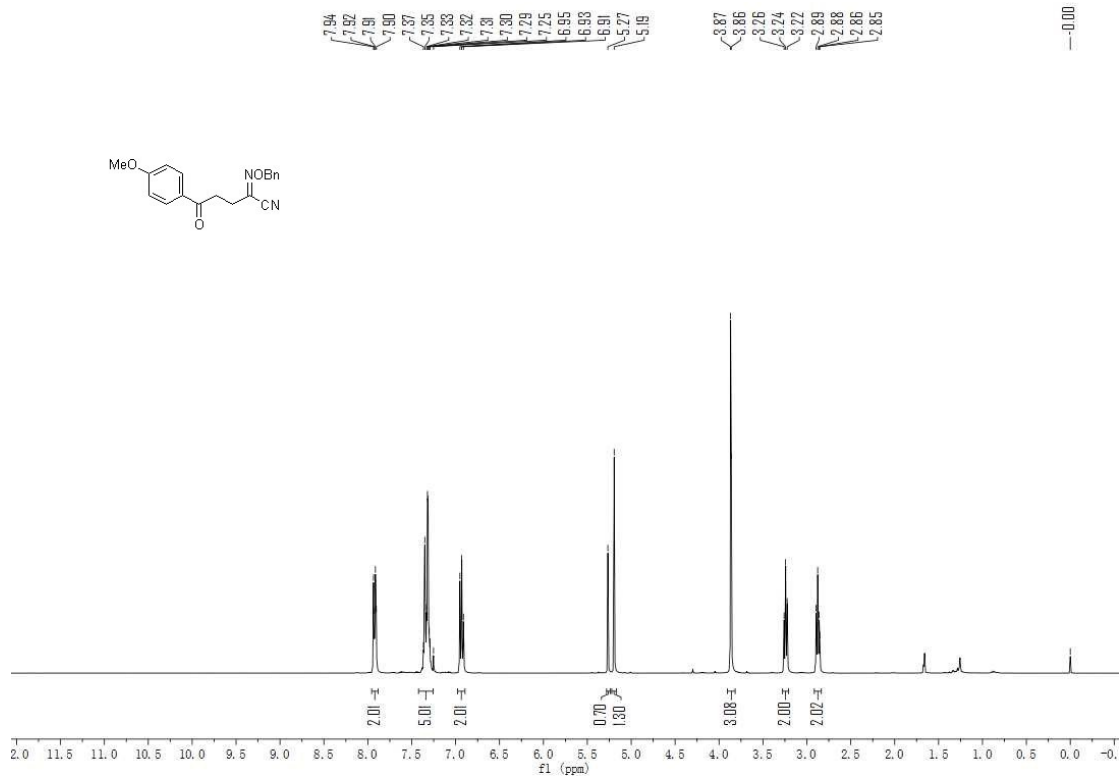

### <sup>13</sup>C NMR spectrum of 3al

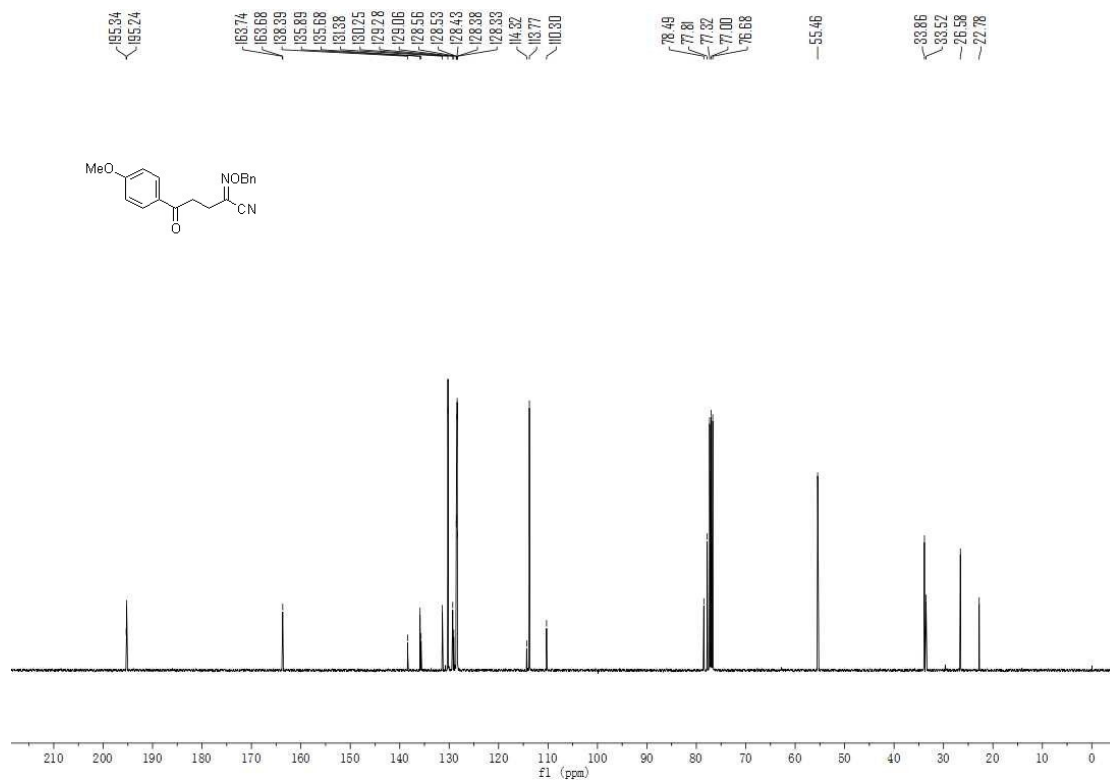

### <sup>1</sup>H NMR spectrum of 3am

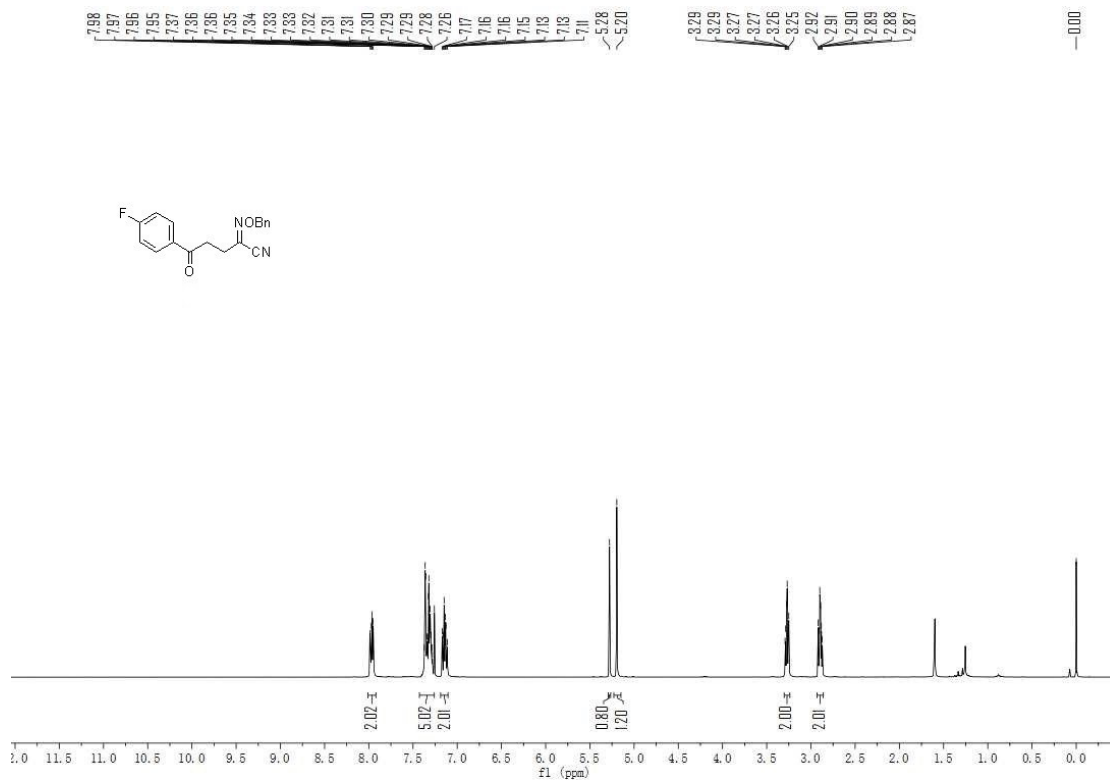

### <sup>13</sup>C NMR spectrum of 3am

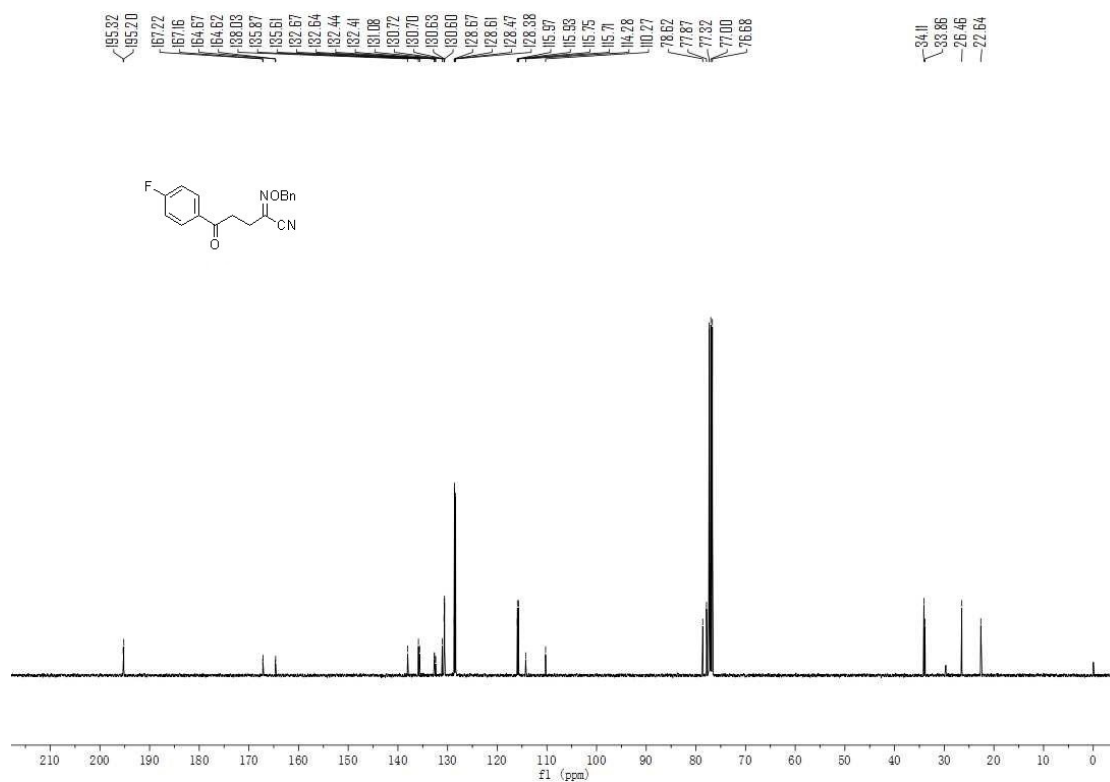

### <sup>1</sup>H NMR spectrum of 3an

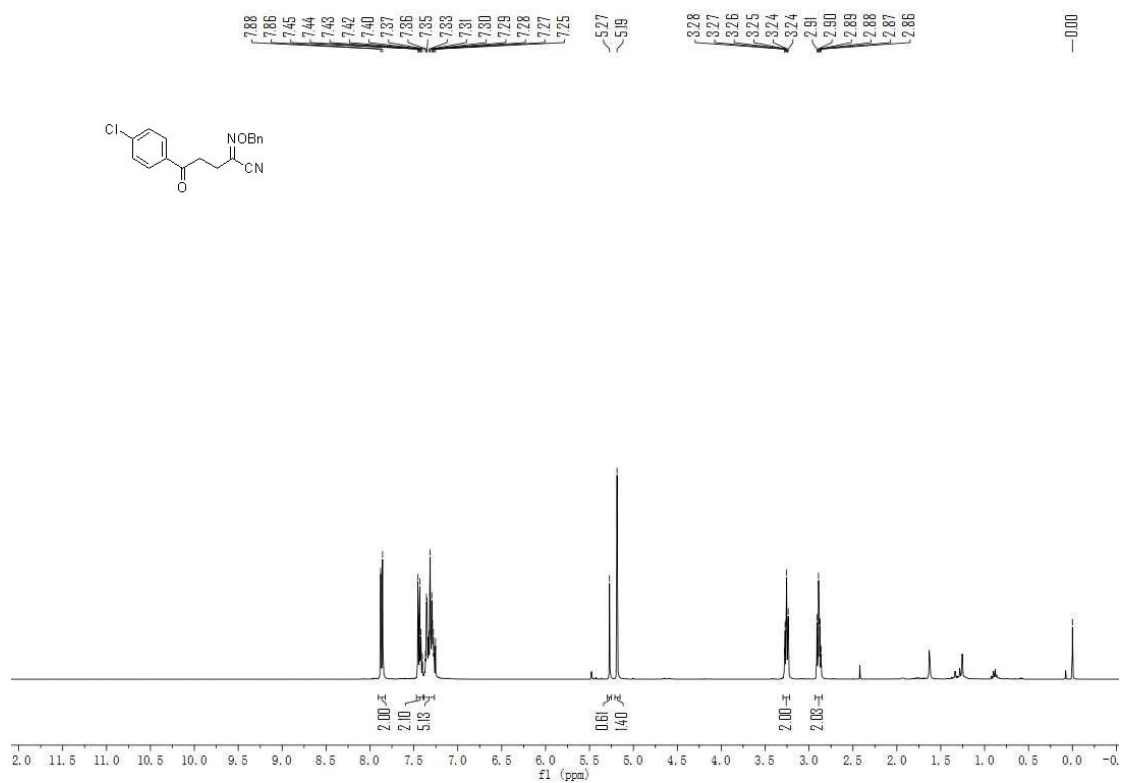

### <sup>13</sup>C NMR spectrum of 3a

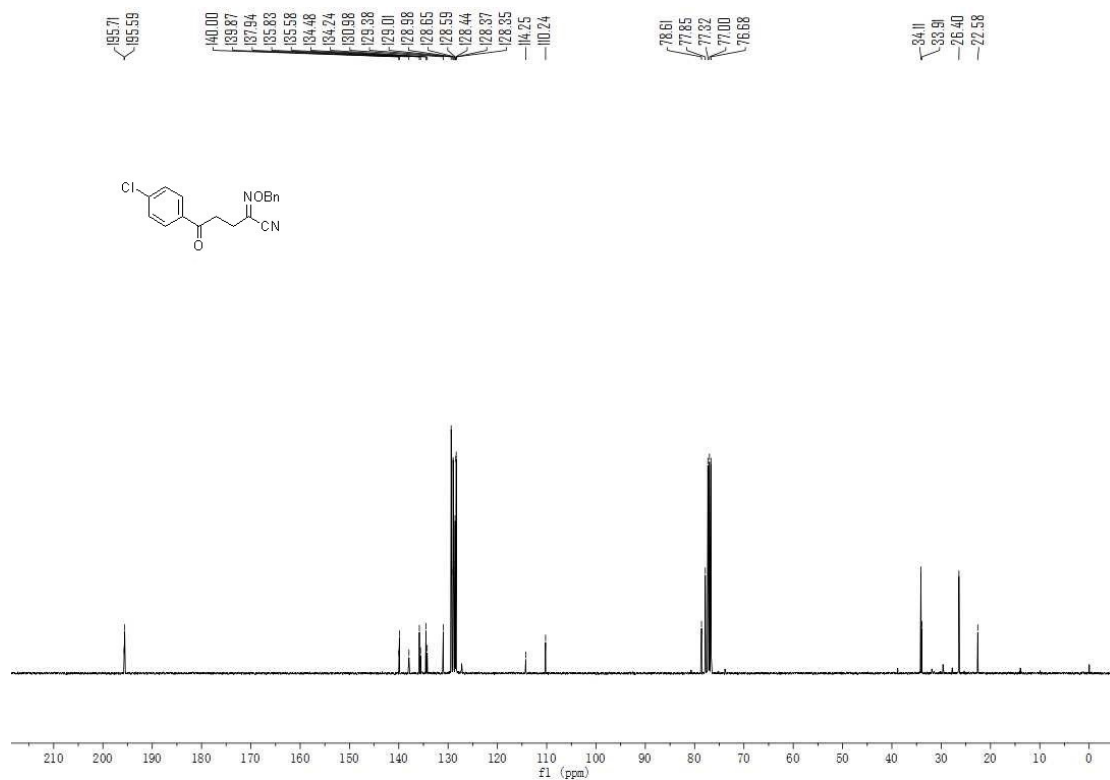

### <sup>1</sup>H NMR spectrum of 3ao

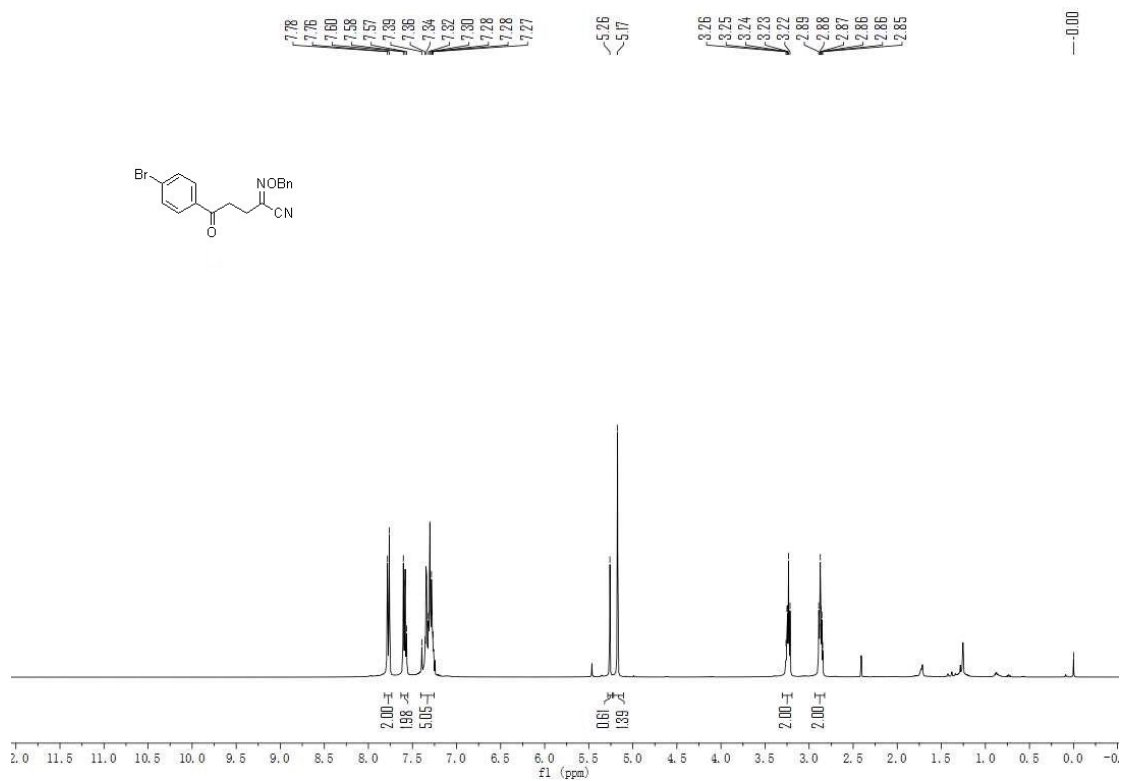

**<sup>13</sup>C NMR spectrum of 3ao**

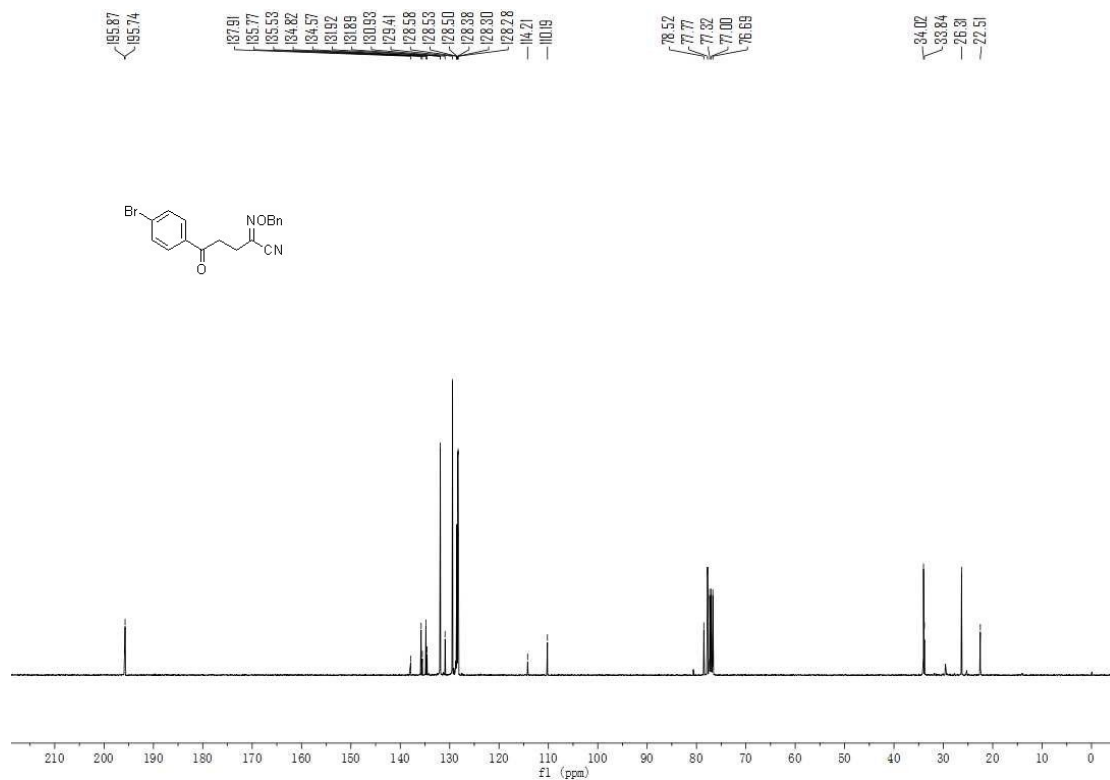

**<sup>1</sup>H NMR spectrum of 3ap**

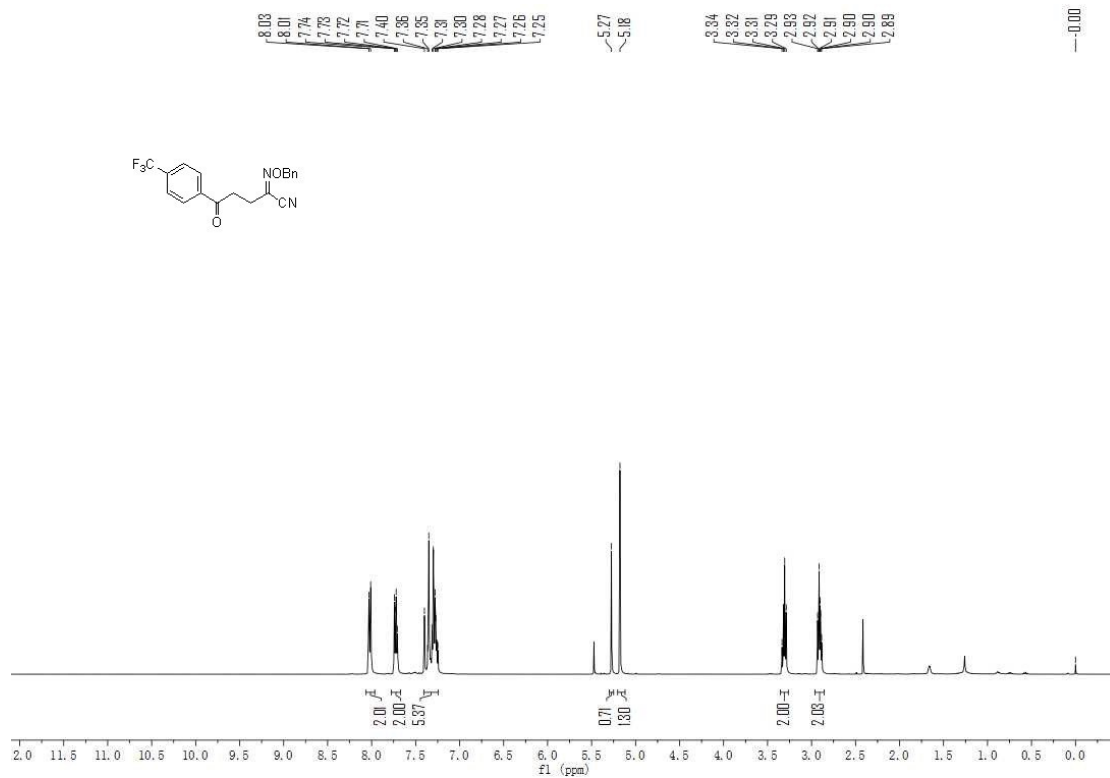

**<sup>13</sup>C NMR spectrum of 3ap**

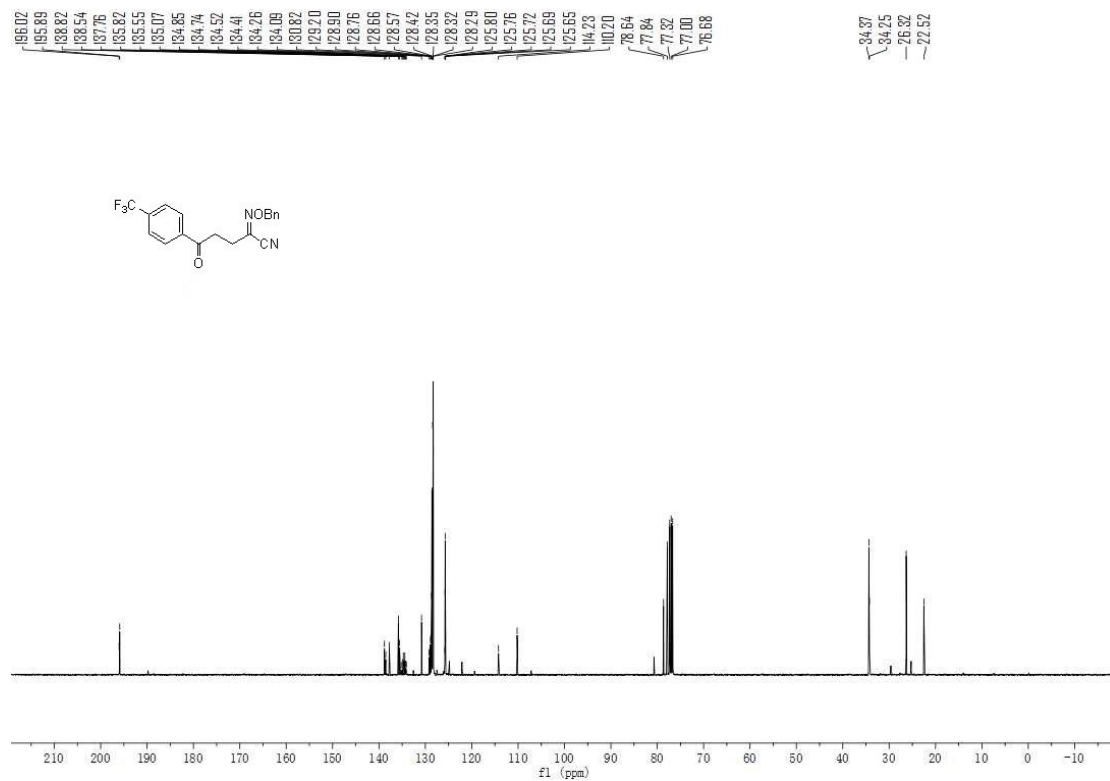

**<sup>19</sup>F NMR spectrum of 3ap**



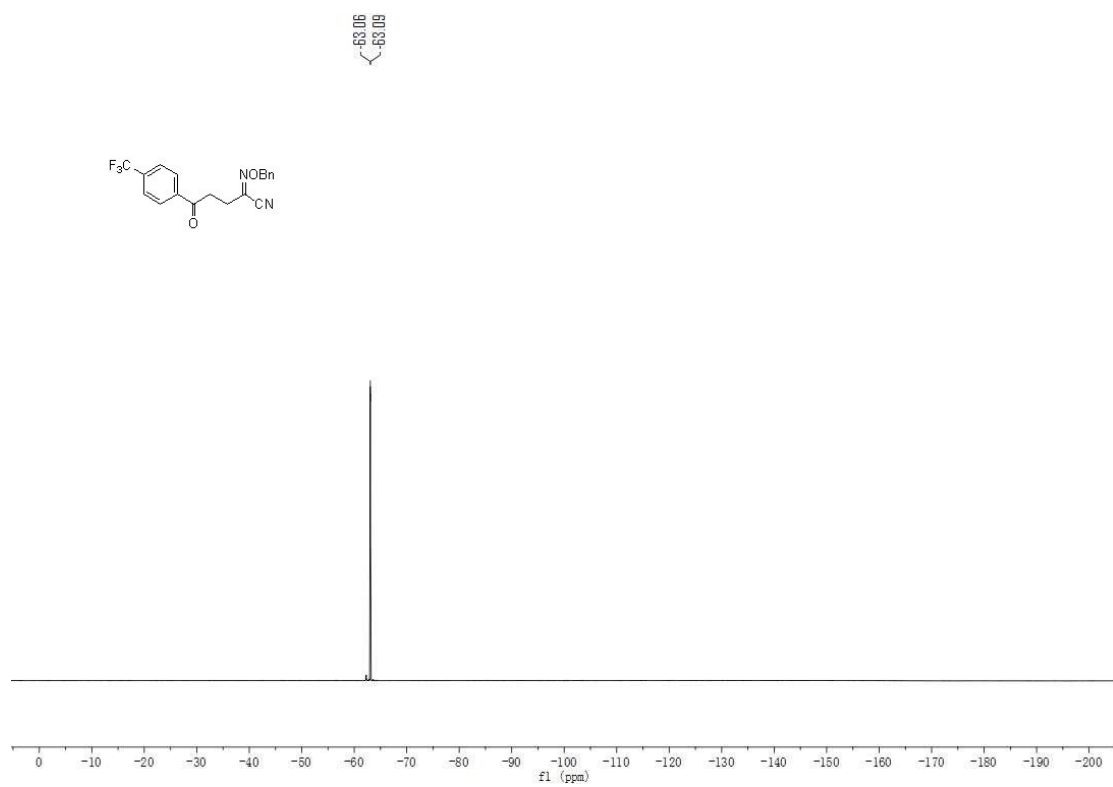

**<sup>1</sup>H NMR spectrum of 3aq**

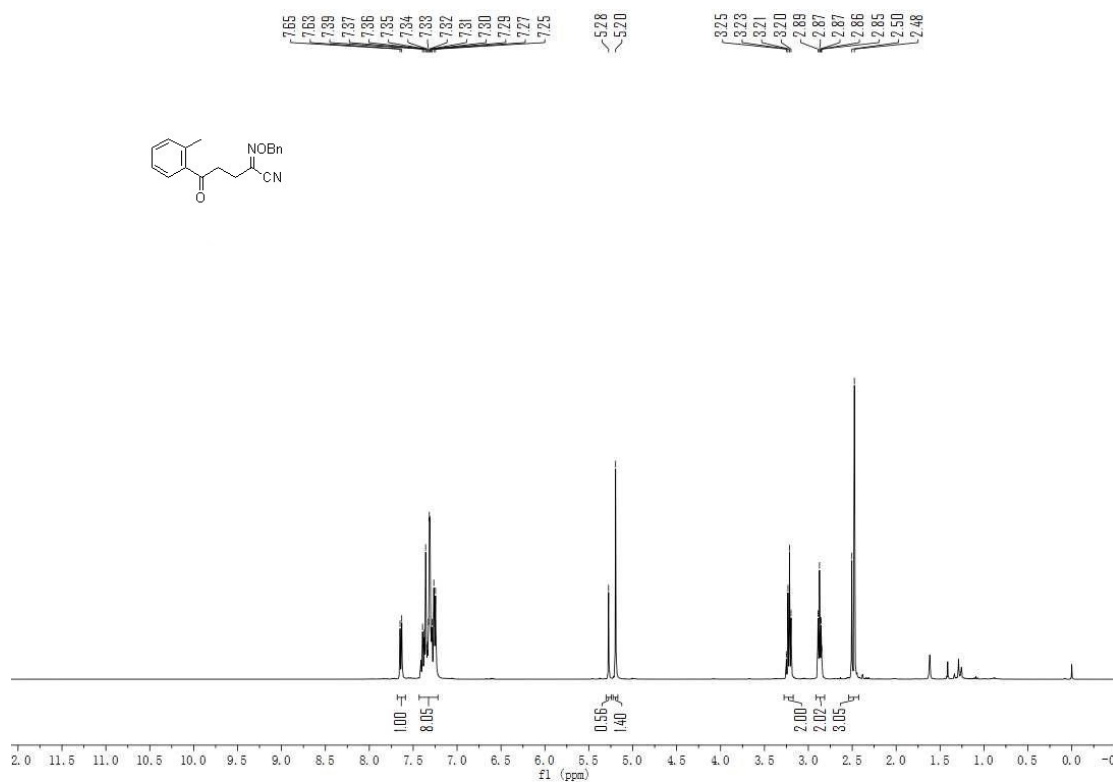

**<sup>13</sup>C NMR spectrum of 3aq**



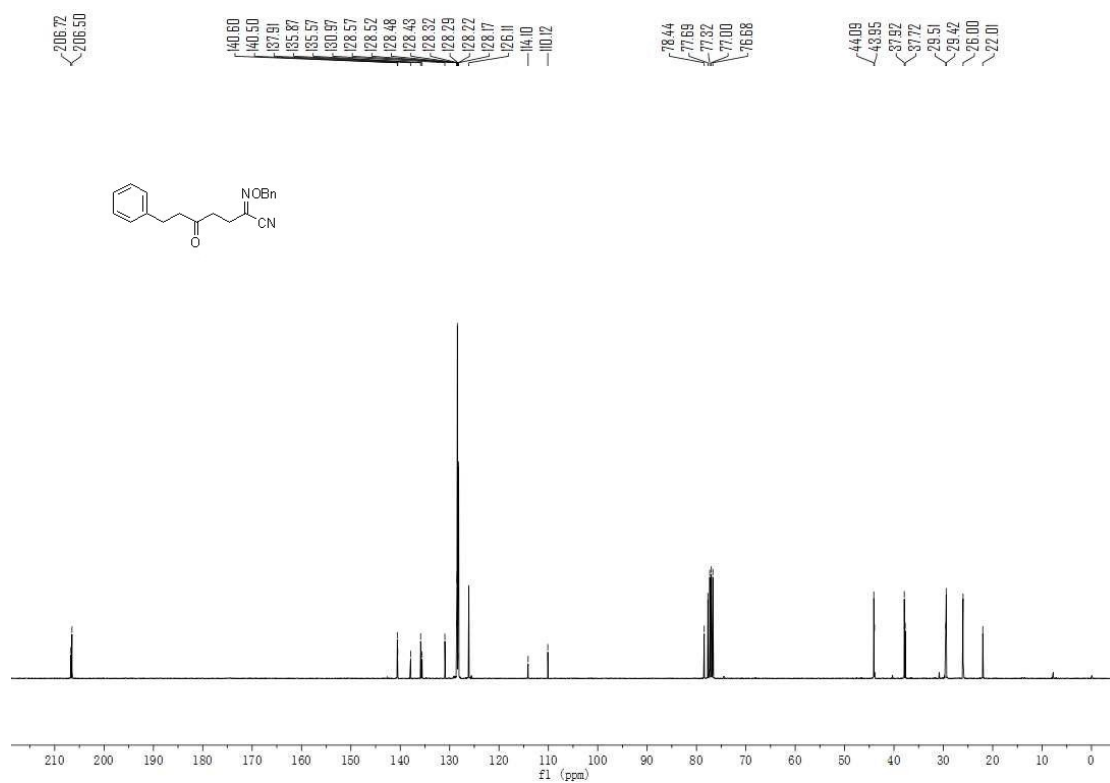

**<sup>1</sup>H NMR spectrum of 3as**

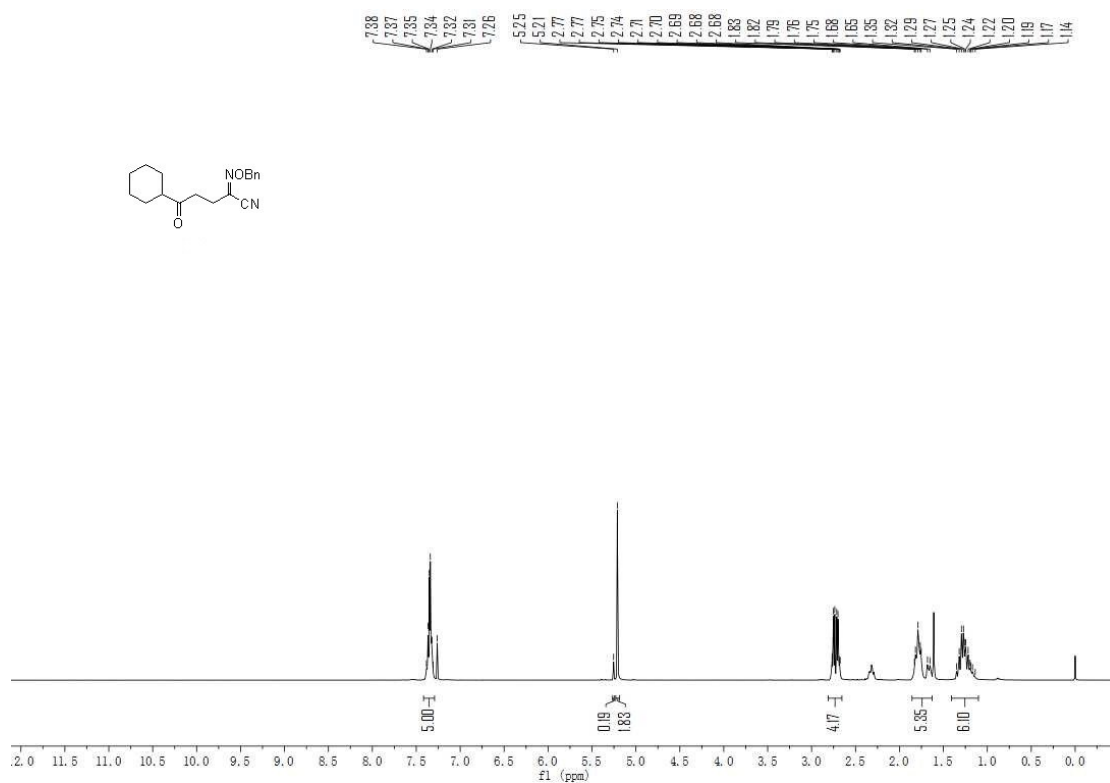

**<sup>13</sup>C NMR spectrum of 3as**

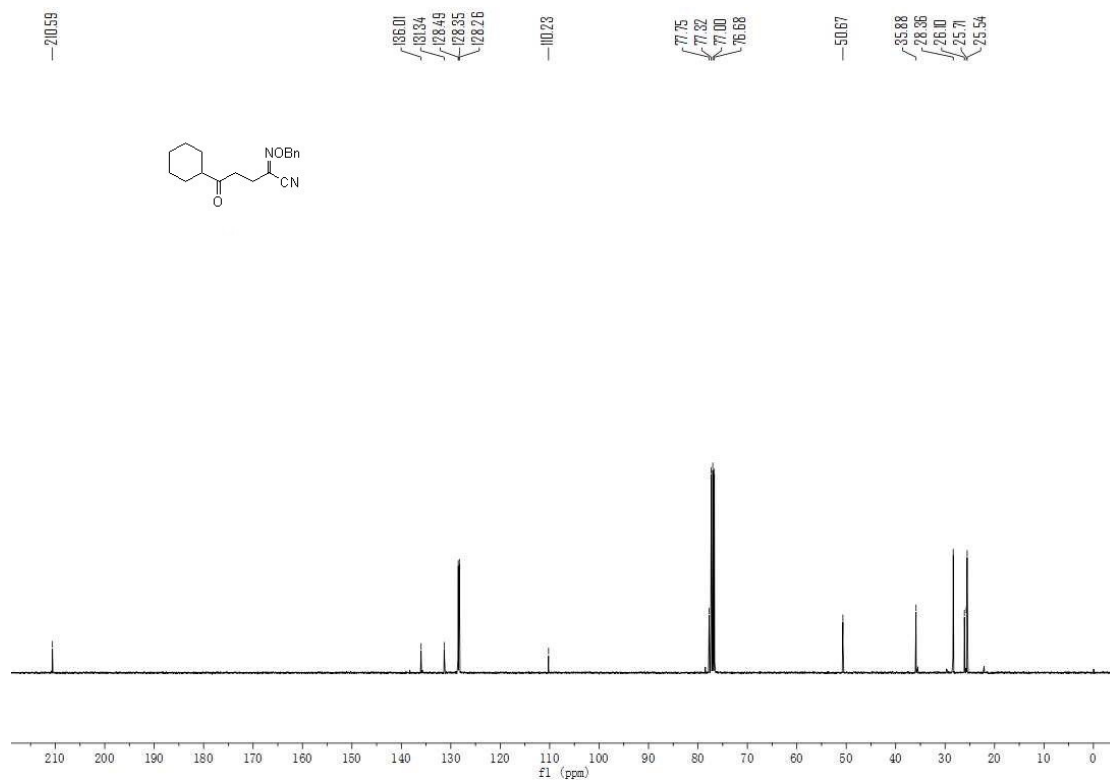

### <sup>1</sup>H NMR spectrum of 3at

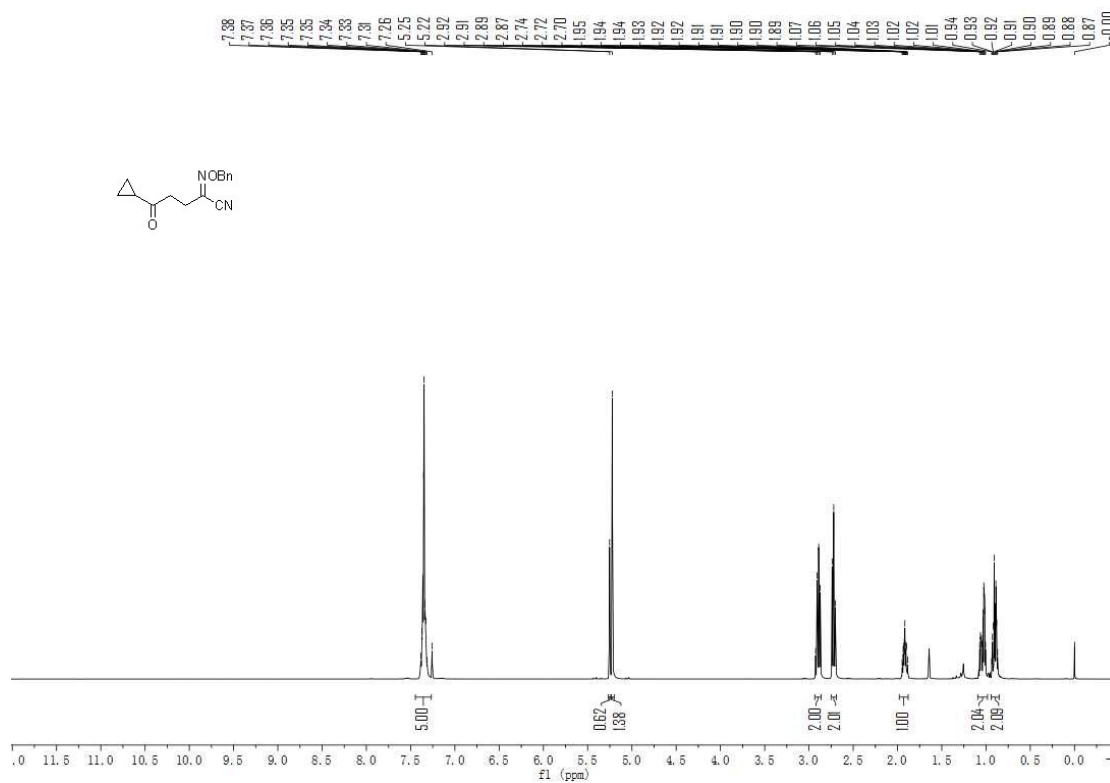

### <sup>13</sup>C NMR spectrum of 3at

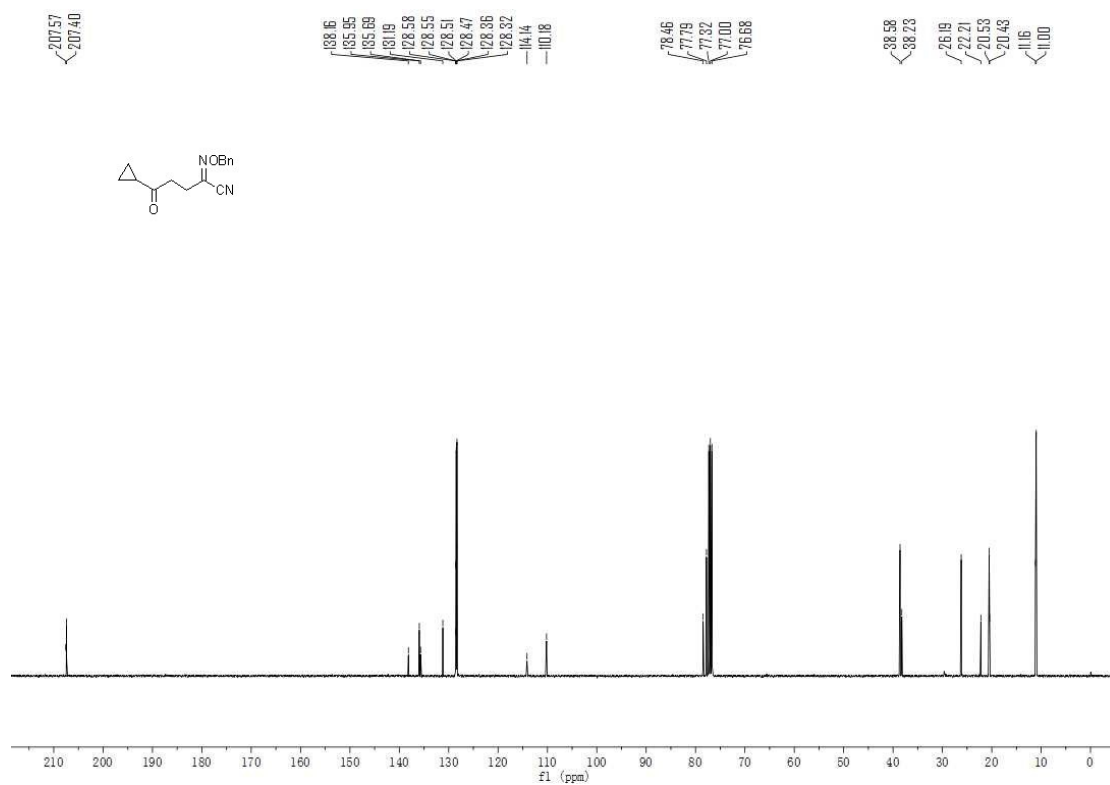

### <sup>1</sup>H NMR spectrum of 3au

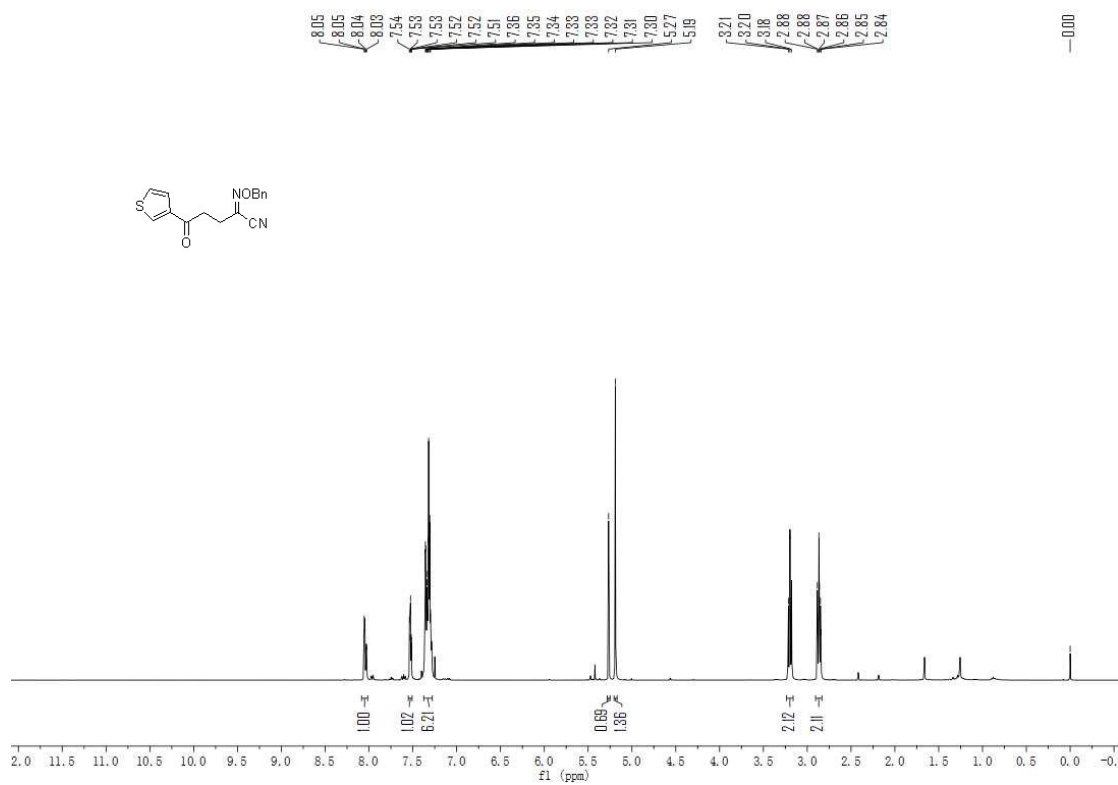

### <sup>13</sup>C NMR spectrum of 3au

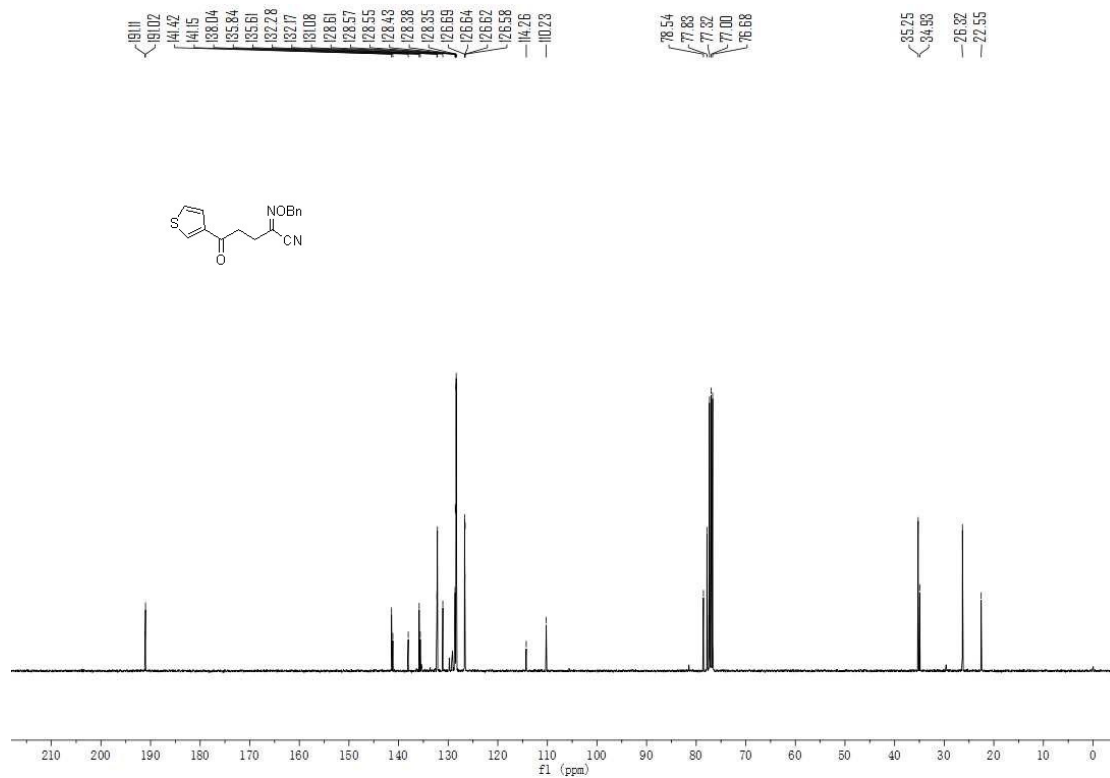

### 1H NMR spectrum of 3av

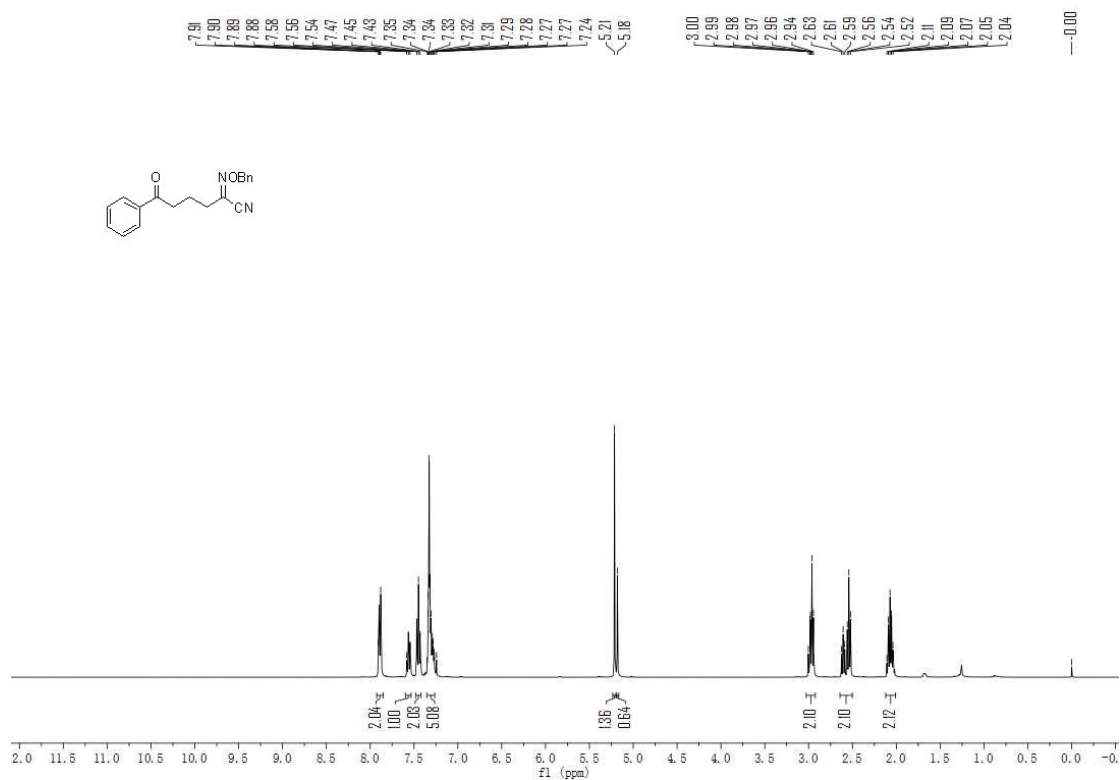

### <sup>13</sup>C NMR spectrum of 3av

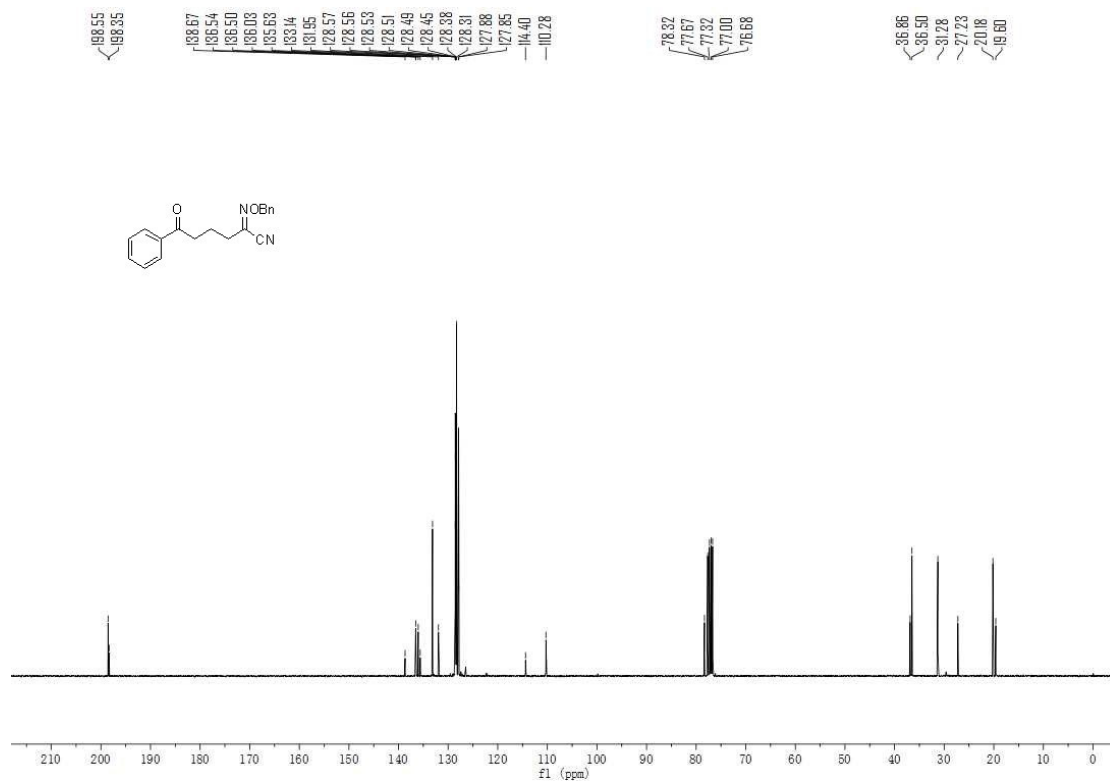

### <sup>1</sup>H NMR spectrum of 3aw

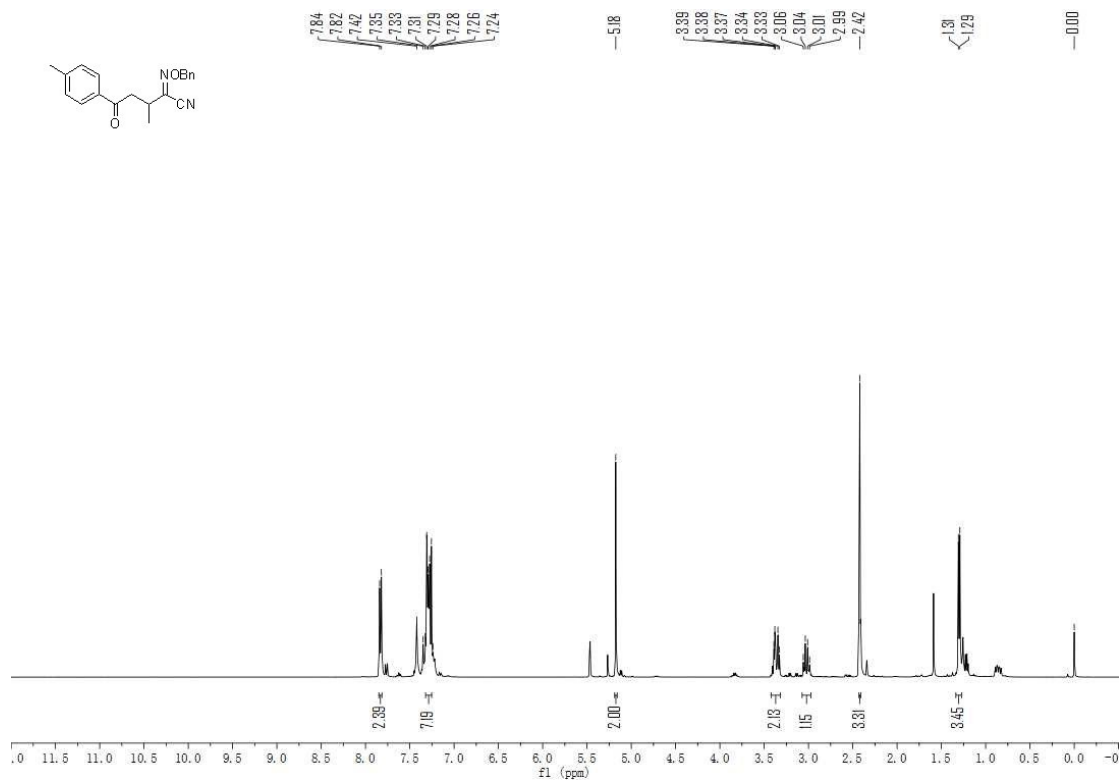

### <sup>13</sup>C NMR spectrum of 3aw

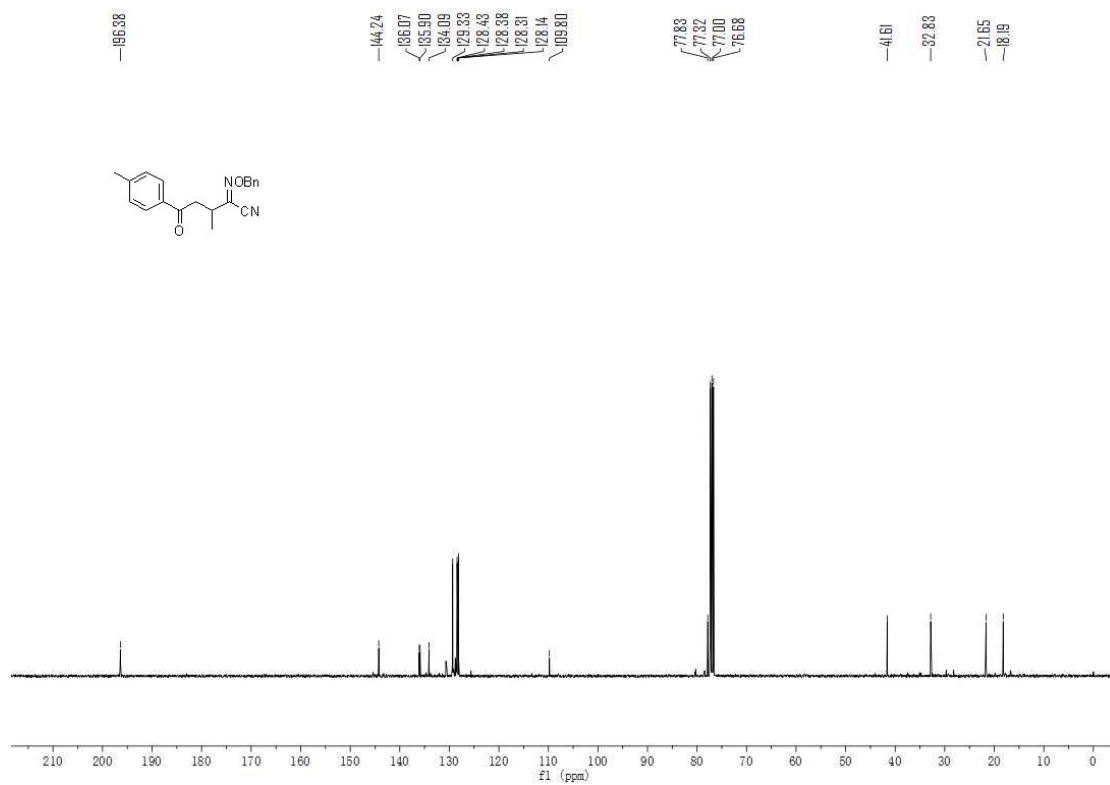

**<sup>1</sup>H NMR spectrum of 7**

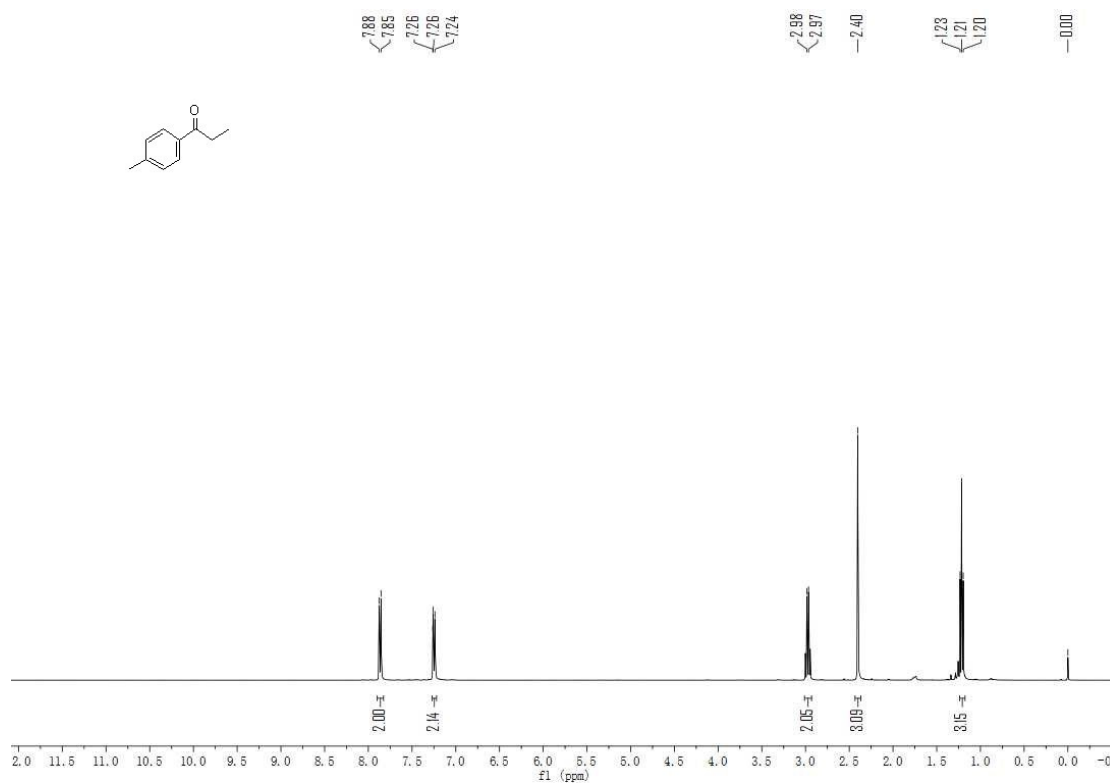

**<sup>1</sup>H NMR spectrum of 8**



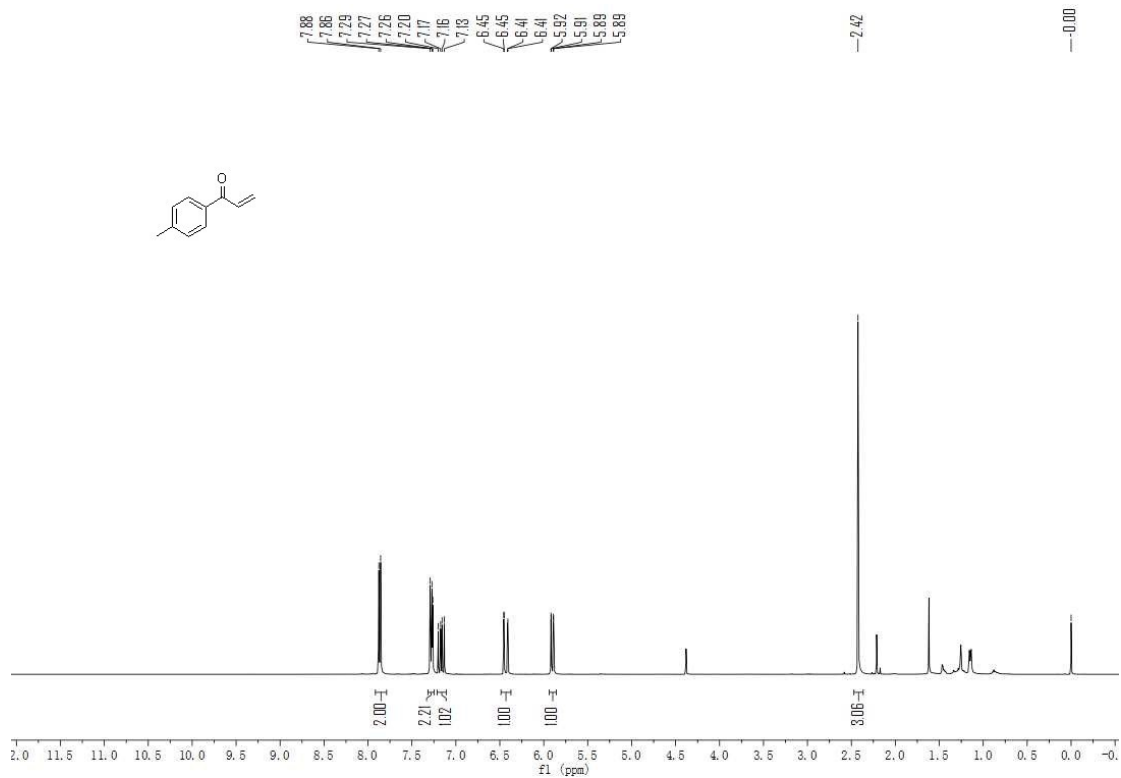

### <sup>1</sup>H NMR spectrum of 9 and 10

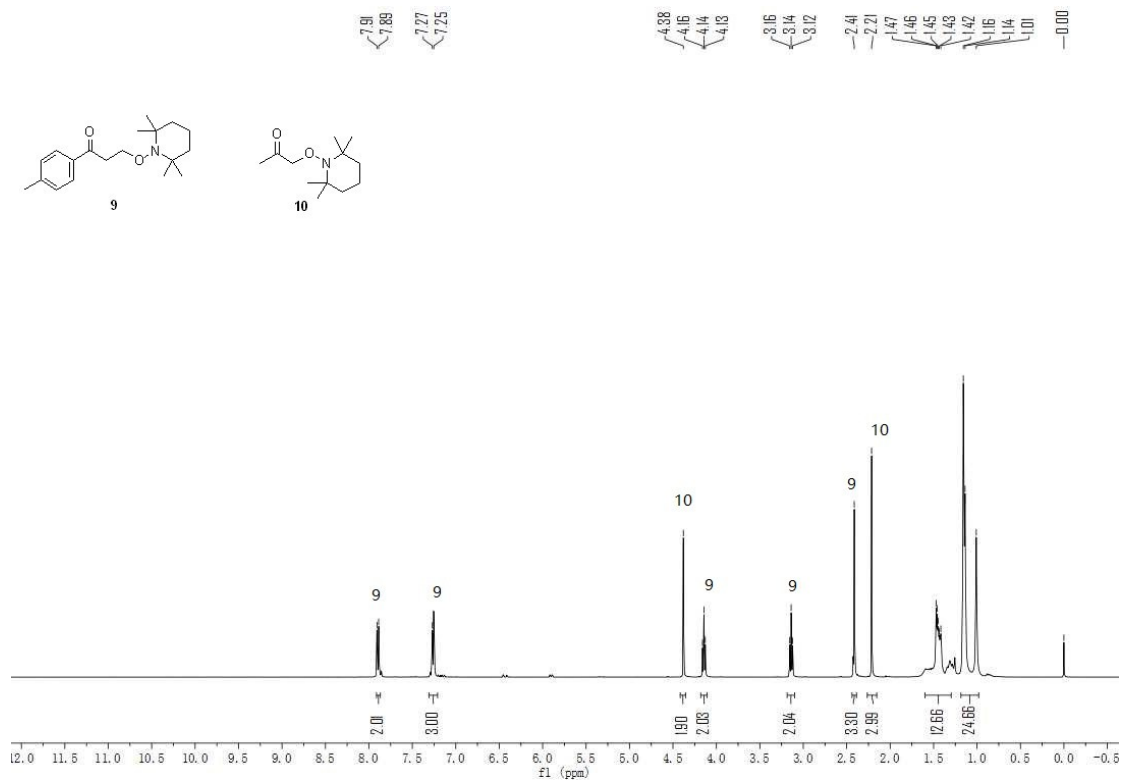

# <sup>1</sup>H NMR spectrum of 11

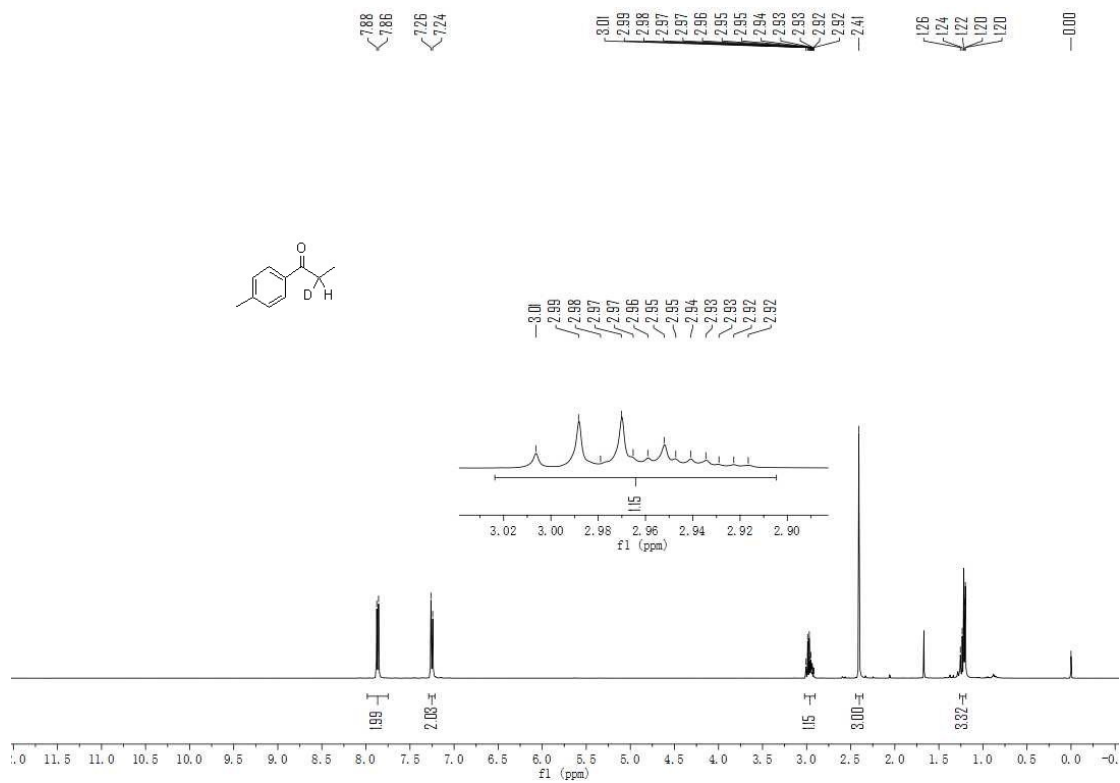

Supplement: d0ob00055h1.pdf [file d0ob00055h1.pdf]
